# Supplementary material for: Synthetic Lethality Screening Highlights Colorectal Cancer Vulnerability to Concomitant Blockade of NEDD8 and EGFR Pathways
Source: MDPI journal article supplement (doi:10.3390/cancers13153805), 2021-07-28
Supplement: s1 [file s1]

# Supplementary Materials: Synthetic Lethality Screening Highlights Colorectal Cancer Vulnerability to Concomitant Blockade of NEDD8 and EGFR Pathways

Federica Invrea, Simona Punzi, Consalvo Petti, Rosalba Minelli, Michael D. Peoples, Christopher A. Bristow, Valentina Vurchio, Alessia Corrado, Alberto Bragoni, Caterina Marchiò, Andrea Bertotti, Livio Trusolino, Alberto Bardelli, Claudio Isella, Alessandro Carugo, Giulio F. Draetta and Enzo Medico

## Supplementary Methods

### *Library Composition*

The shRNA library targeted 200 genes (10 shRNAs per gene), which sequences were designed using a proprietary algorithm (Cellecta Inc.). shRNAs were under the control of a constitutive U6 promoter and univocally associated to a barcode cassette (BC) of 18, non-overlapping nucleotides to specifically “tag” individual constructs. The library also contained two positive (PSMA1, RPL30) and a neutral (Luciferase, LUC) controls.

### *shRNA Library Transduction and in vitro Screening*

Concentrated lentiviral particles from the shRNAs library were produced by transfecting 293T cells, as described in the Cellecta User Manual (<https://manuals.cellecta.com/rnai-pooled-lentiviral-shrna-libraries/> accessed on 1 May 2020), and were independently added in triplicate to CRC cell lines used for the *in vitro* screening, together with 8 µg/mL polybrene (Sigma) for 24 hours and then standard growth medium was replaced. At 72h post transduction, the percentage of infected cells was determined through flow cytometry analysis and 3 µg/mL of puromycin was added before performing the experiments. Library infection was performed using a Multiplicity of Infection (MOI) of ~0.2 Transducing Unit/cell. Cells were then amplified for approximately twenty doublings in presence (+) or ten doublings in absence (–) of pevonedistat at a concentration that reduced growth rate rather than totally impair cell proliferation. Pevonedistat concentration, specifically chosen for each cell line, was 25 nM for CAR1, 100 nM for LIM2099 and SW403 and 200 nM for WIDR. Genomic DNA (gDNA) was extracted immediately from cells after complete puromycin selection as reference, and after cellular doublings +/- pevonedistat. At every passage, cells were manually counted and at least 4 million were re-plated to preserve the correct representation (1000× coverage) of the library. GDNA extraction, PCR assay and Next Generation Sequencing (NGS) were performed according to Cellecta User Manual.

### *Sequences and Data Analysis*

BCs representation was measured by NGS on Illumina NextSeq and BCs were identified by aligning each sequencing read to the barcoded-libraries using the Bowtie aligner (2.0.2), and by considering only those BCs having, at most, three mismatches in each alignment. Upon quantification each shRNA barcode, data were normalized on library size calculating counts *per* millions (CPM). Accordingly, library constructs were represented with more than one CPM in more than 99.9% in the unselected cells supporting the complete representation and capture of the library. Each experiment included two control points: the basal, library infected unselected cells, the library infected cells after 20 cell doublings, and library infected cells selected with pevonedistat treatment. To ensure robust identification of shRNA construct depletion in pevonedistat selection, in each replicate we calculated for each construct the LOG<sub>2</sub> fold change of comparing pevonedistat selected cells and the minimum value of the controls. On such data, Lucif-

erase targeting shRNAs, as neutral controls, were employed as to define minimum threshold to call the depletion. To minimize false calling, each single shRNA targeting construct was then called depleted if ranked below the 33<sup>th</sup> percentile of the distribution in each replicate for CAR1, LIM2099 and SW403; WiDr required a 25<sup>th</sup> percentile threshold. Finally, to identify gene depletion we required a minimum of four shRNAs to be depleted in all the biological replicates.

#### *Immunohistochemistry*

After deparaffinization, endogenous peroxidase was blocked in 3% hydrogen peroxide and heating antigen retrieval was carried in citrate buffer (pH 6.0). Sections were stained with monoclonal mouse anti-human Ki67 (Dako), p21 and p27 (#2947 and #3686; Cell signaling Technology) antibodies. Immunoreactivities were revealed by incubation in DAB chromogen (Dako). Slides were counterstained in Mayer's hematoxylin. Images were acquired by Olympus AX70 up-right microscope (objective UPLFLN 10×) and processed by using Cell Sens Science Imaging Software (Olympus corporation, Japan). Images are presented at 10X magnification (scale bar 200  $\mu$ m). The markers' quantification (Ki67, p21 and p27) was calculated on more representative areas of the tumors for at least 15 microscopic fields in different sections and expressed as percentage (mean  $\pm$  SD).

## Supplementary Figures

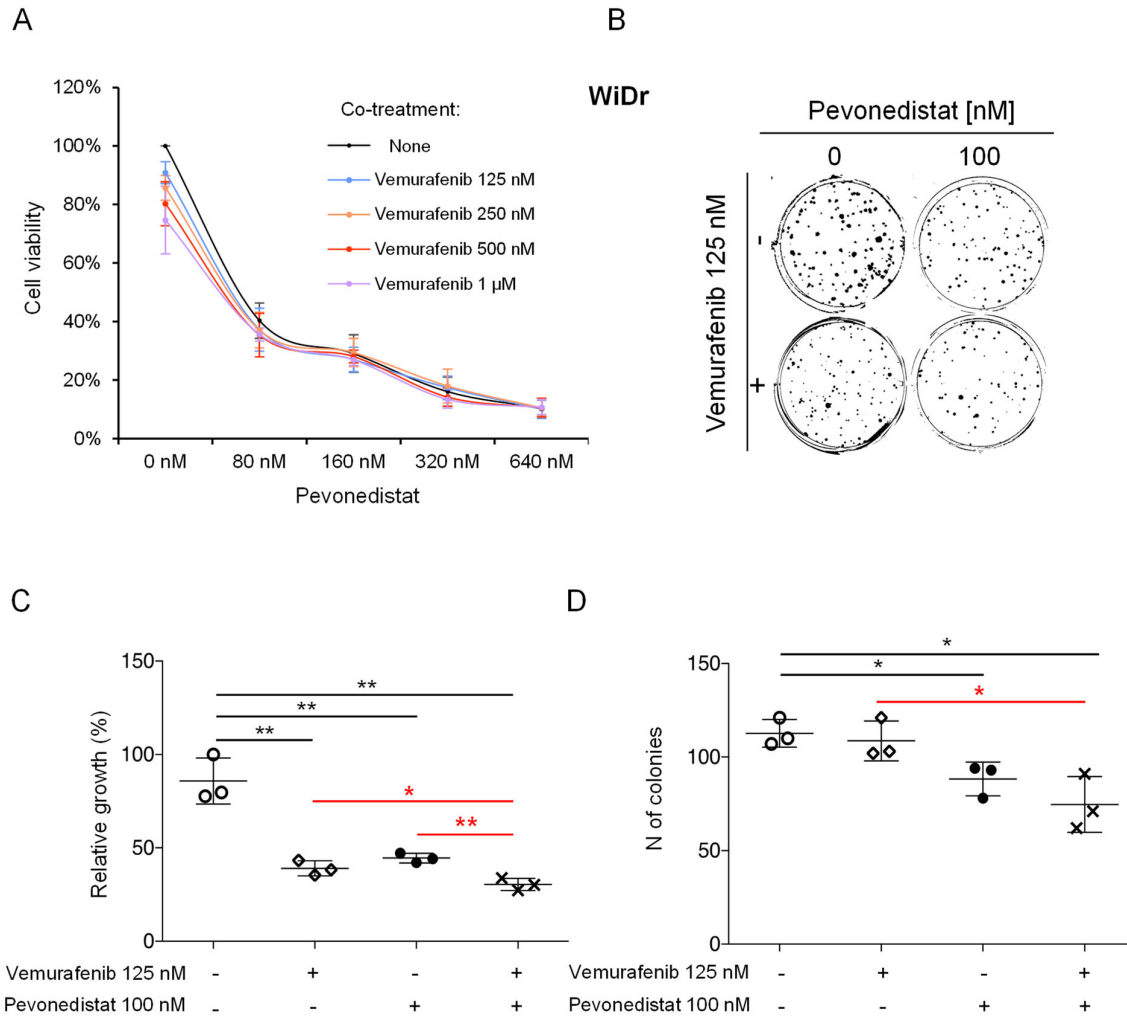

**Figure S1.** Evaluation of pevonedistat and vemurafenib sensitivity on *BRAF*-mutant WiDr cells. **(A)** Short-term dose-response proliferation assay on WiDr treated with increasing concentrations of pevonedistat combined with different doses of vemurafenib. At 96h the percentage of cell viability was estimated and normalized to the untreated cells. Data are expressed as average  $\pm$  SD of four technical replicates. **(B)** Colonies formation of WiDr *BRAF*-mutant cells was evaluated in response to 100 nM of pevonedistat after 17 days of treatment in presence and absence of *BRAF* inhibitor vemurafenib (125 nM). Cells were fixed by using Cristal Violet. **(C)** WiDr colonies relative growth was quantified by ImageJ analysis in triplicate and expressed as relative growth in percentage. Significant differences among groups were evaluated by Student *t* test (\*:  $p < 0.05$ ; \*\*:  $p < 0.01$ ). **(D)** Number of WiDr colonies was quantified by ImageJ analysis in triplicate. Significant differences among groups were evaluated by Student *t* test (\*:  $p < 0.05$ ).

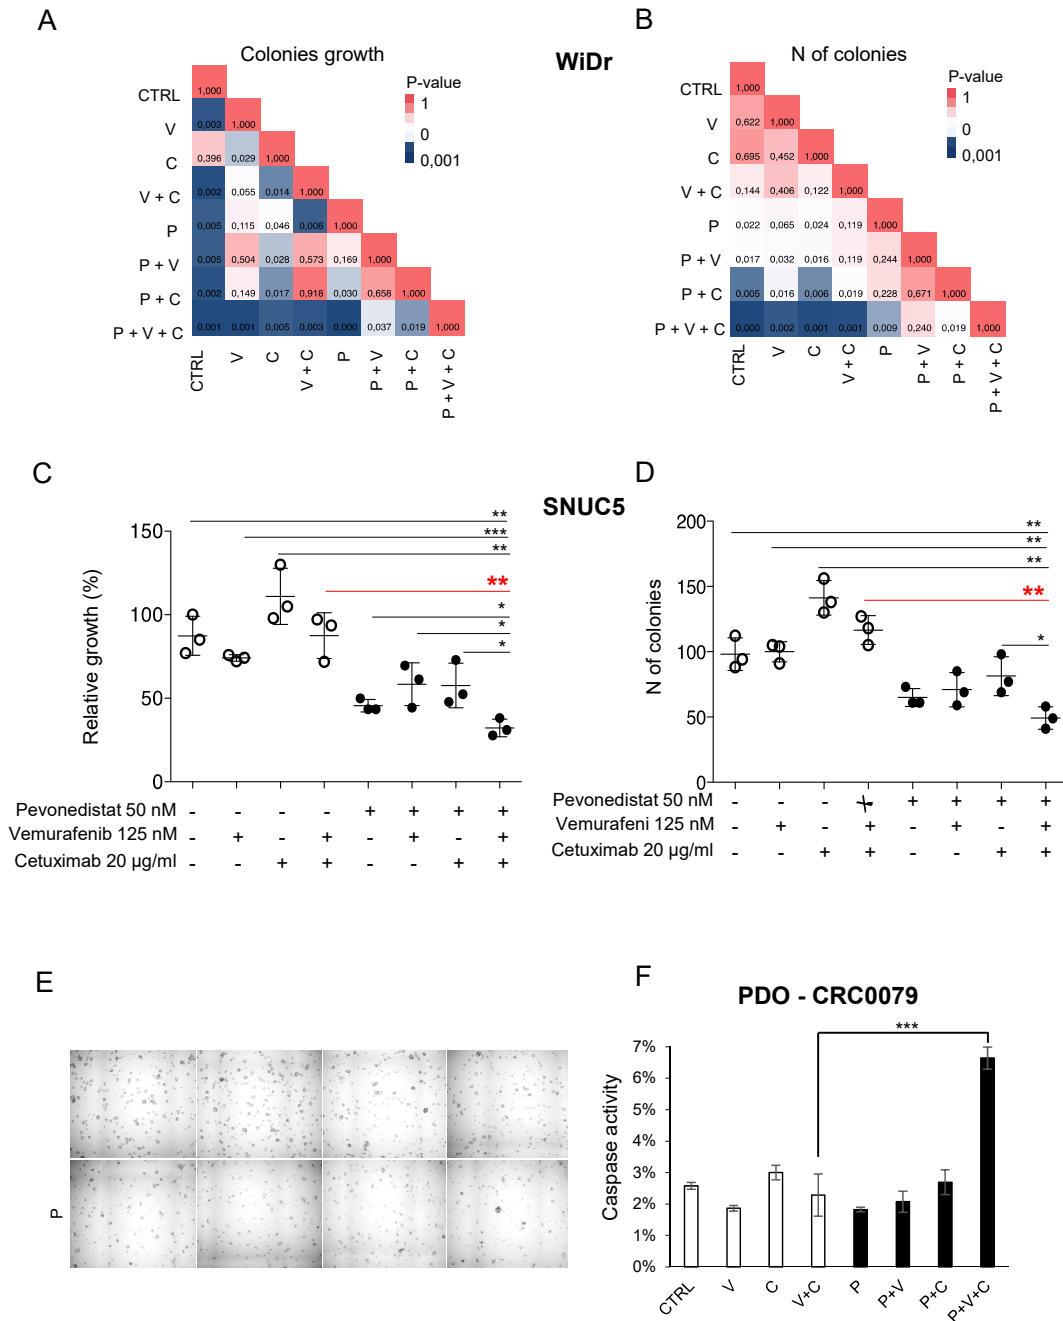

**Figure S2.** Effect of pevonedistat combined with EGFR inhibition on colony formation in *BRAF*-mutant CRC cell lines and organoids. A–B. WiDr cells were used to perform a colony formation assay and response to pevonedistat (100 nM), cetuximab (20 µg/ml), vemurafenib (125 nM) alone or in combination was evaluated. After 17 days cells were fixed by crystal violet. Relative growth of WiDr colonies (A) and their number (B) were quantified in triplicate and significant differences among groups (pevonedistat–P; vemurafenib–V; cetuximab–C) were analyzed by applying a Student *t* test as show in the heat maps. C–D. An additional *BRAF*-mutant CRC cell line SNUC5 was used to perform a colony formation assay and response to pevonedistat (100 nM), cetuximab (20 µg/mL), vemurafenib (125 nM) alone or in combination was evaluated. After 8 days cells were fixed by crystal violet. Relative growth of SNUC5 colonies (C) and their number (D) were quantified in triplicate and significant differences among triple combination and other treatment groups (pevonedistat–P; vemurafenib–V; cetuximab–C) were analyzed by applying a Student *t* test (\*: *p* < 0.05; \*\*: *p* < 0.01; \*\*\*: *p* < 0.001). (E) *BRAF*-mutant Patient-Derived Organoid (PDO – CRC0079) was treated for 96h with vemurafenib (125 nM), cetuximab (20 µg/ml) and increasing doses of pevonedistat (150 - 300 - 500 nM). Representative images of three technical replicates at 500 nM pevonedistat dose are reported. (F) Caspase-3/7 activity was quantified by Caspase Glo Assay after 24h treatment and expressed as ratio of proliferation. Significant differences among V+C and V+C+P groups were calculated by applying Student *t* test (\*\*\*: *p* < 0.001).

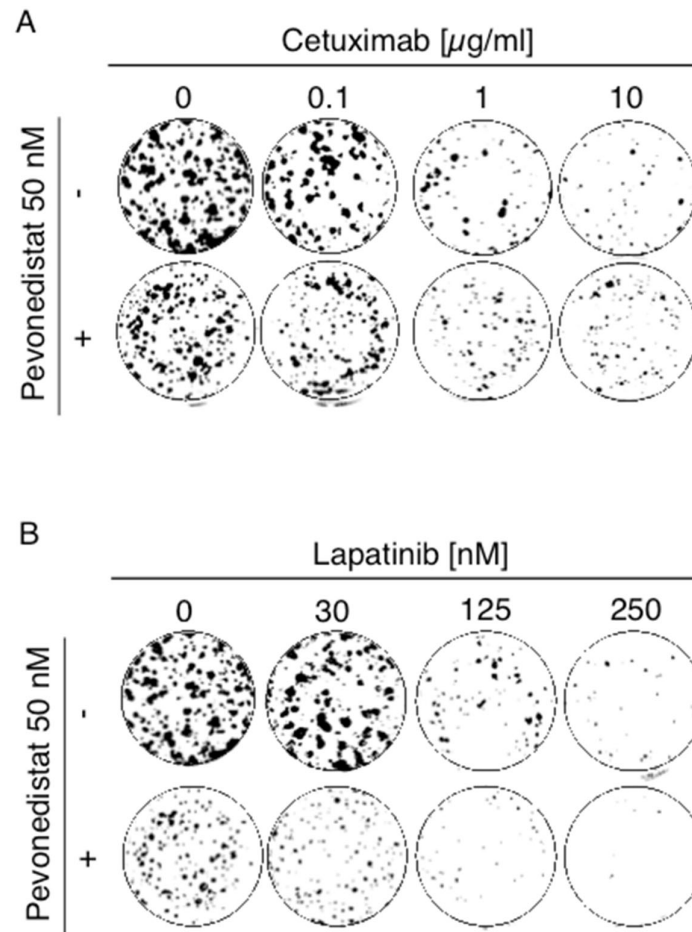

**Figure S3.** Evaluation of pevonedistat sensitivity combined with anti-EGFR inhibitors on *RAS/RAF* WT HCA7 cells. (**A–B**) Colony formation of HCA7 cells was evaluated in response to pevonedistat 50 nM, increasing concentrations of cetuximab (**A**) or lapatinib (**B**) and combinatorial treatments of both. After 13 days cells were fixed by crystal violet. Representative images of three technical replicates are reported.

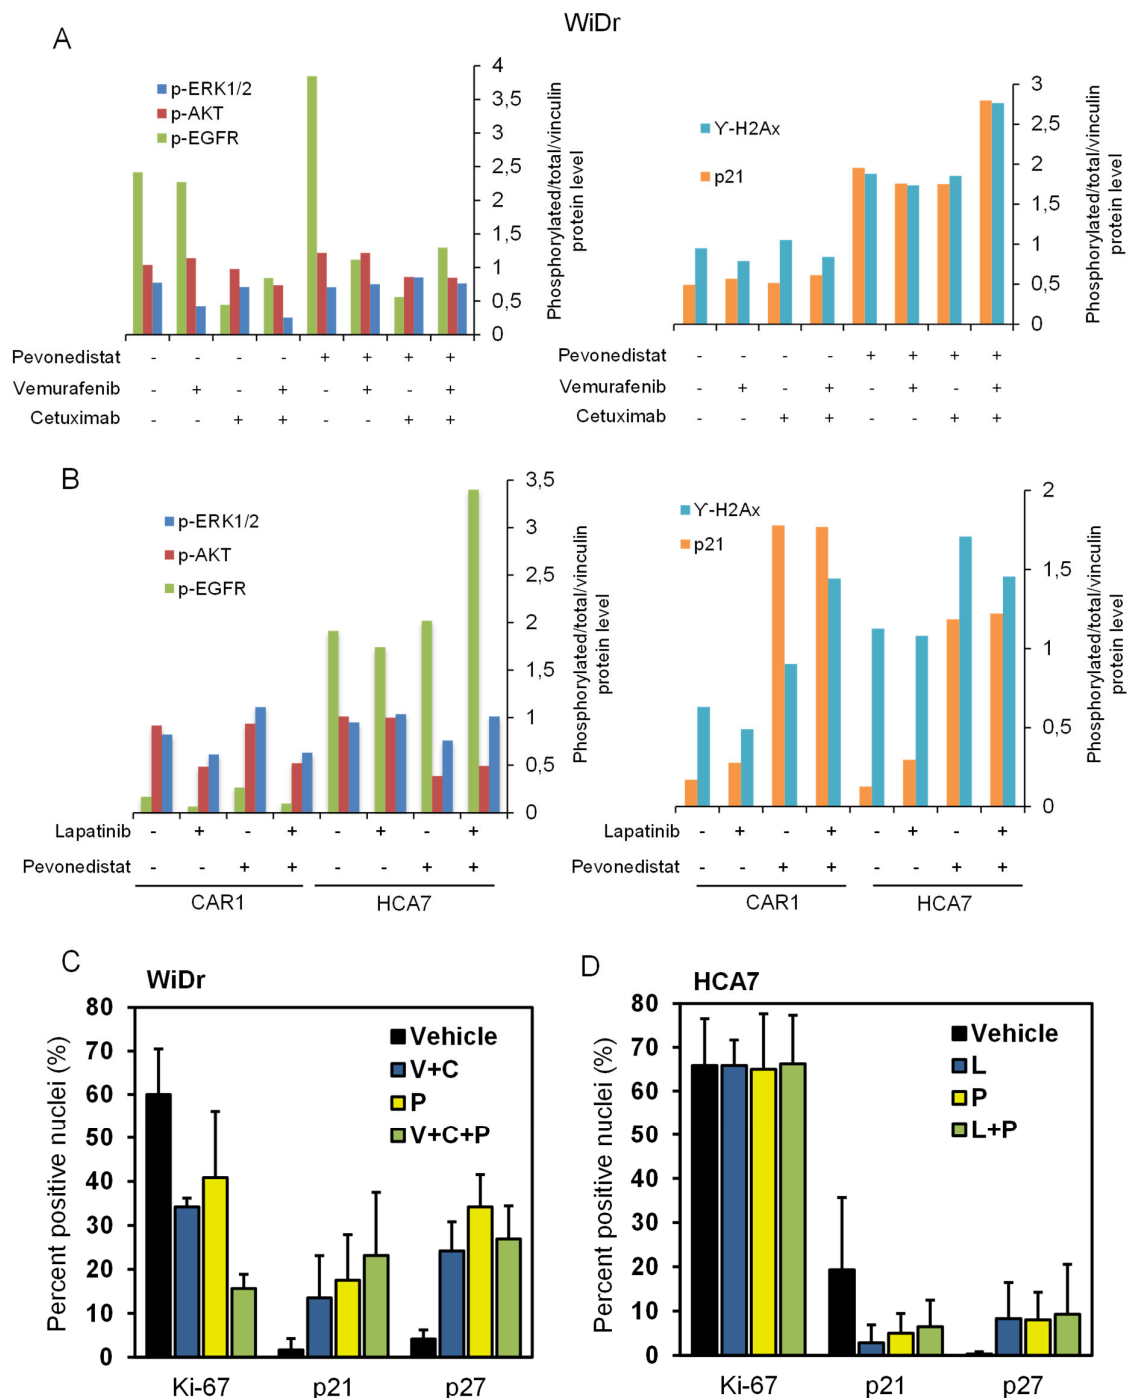

**Figure S4.** Quantification of western blot and immunohistochemistry on *BRAF*-mutant and *RAS/RAF* WT cells (see Main Figure 5). (A) Protein quantification from western blot on WiDr lysates (referred to Main Figure 5A) was performed by using ImageJ software. The level of the phosphorylated forms was expressed as ratio to the respective total form, after normalization of each sample loading by using vinculin. (B) Protein quantification from western blot on CAR1 and HCA7 lysates (referred to Main Figure 5C,D) was performed by using ImageJ software. The level of the phosphorylated forms was expressed as ratio to the respective total form, after normalization of each sample loading by using vinculin. (C) The quantification of immunohistochemistry markers Ki67, p21 and p27 on WiDr xenografts (referred to Main Figure 5B) was calculated on more representative areas of the tumors for at least 15 microscopic fields in different sections and expressed as percentage (mean  $\pm$  SD). (D) The quantification of immunohistochemistry markers Ki67, p21 and p27 on HCA7 xenografts (referred to Main Figure 5E) was calculated on more representative areas of the tumors for at least 15 microscopic fields in different sections and expressed as percentage (mean  $\pm$  SD).

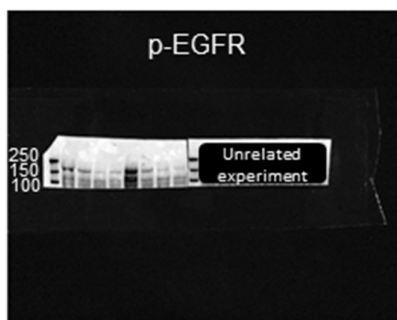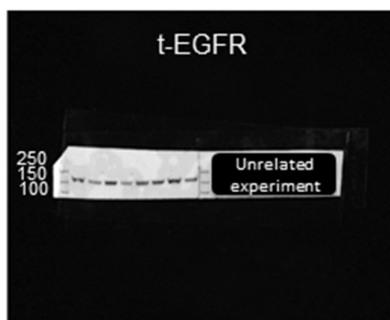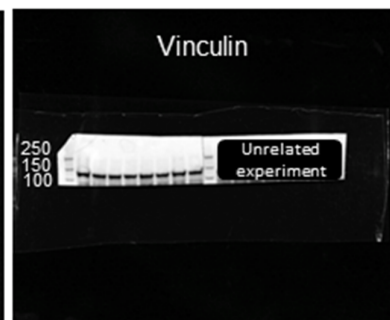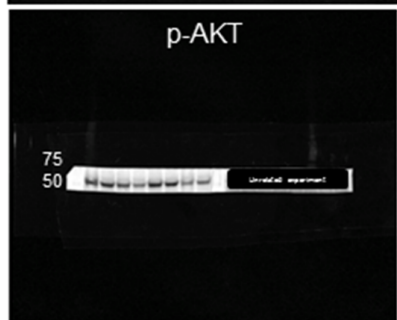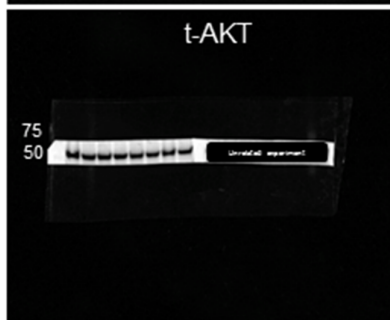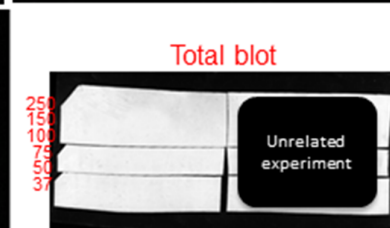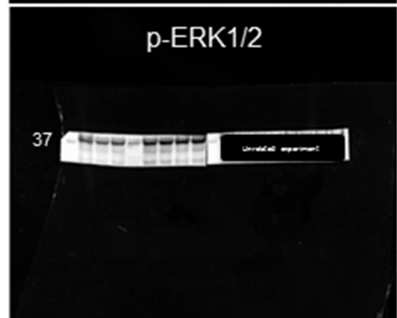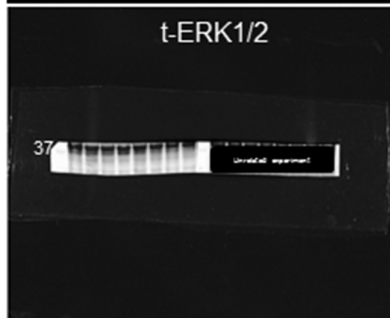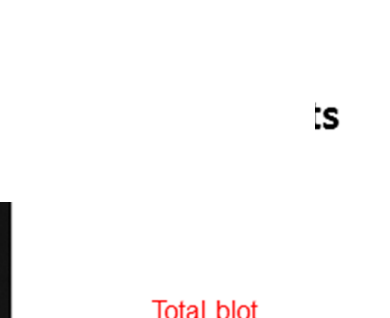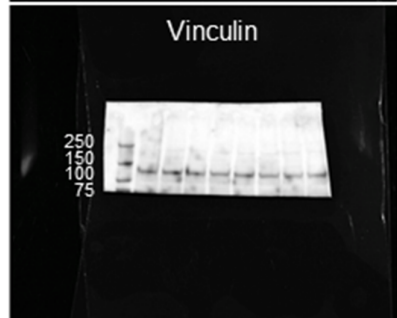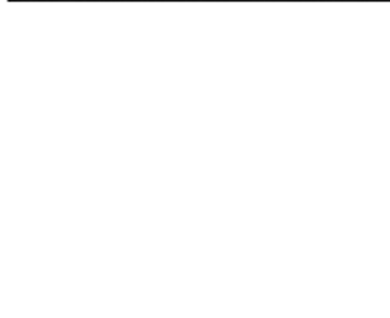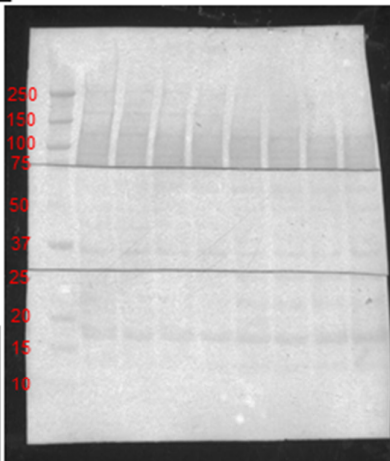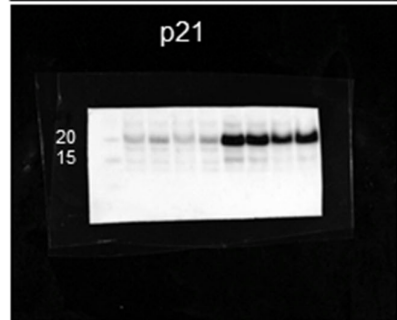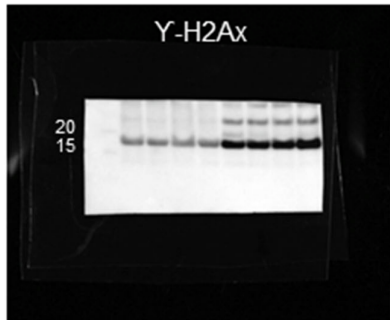

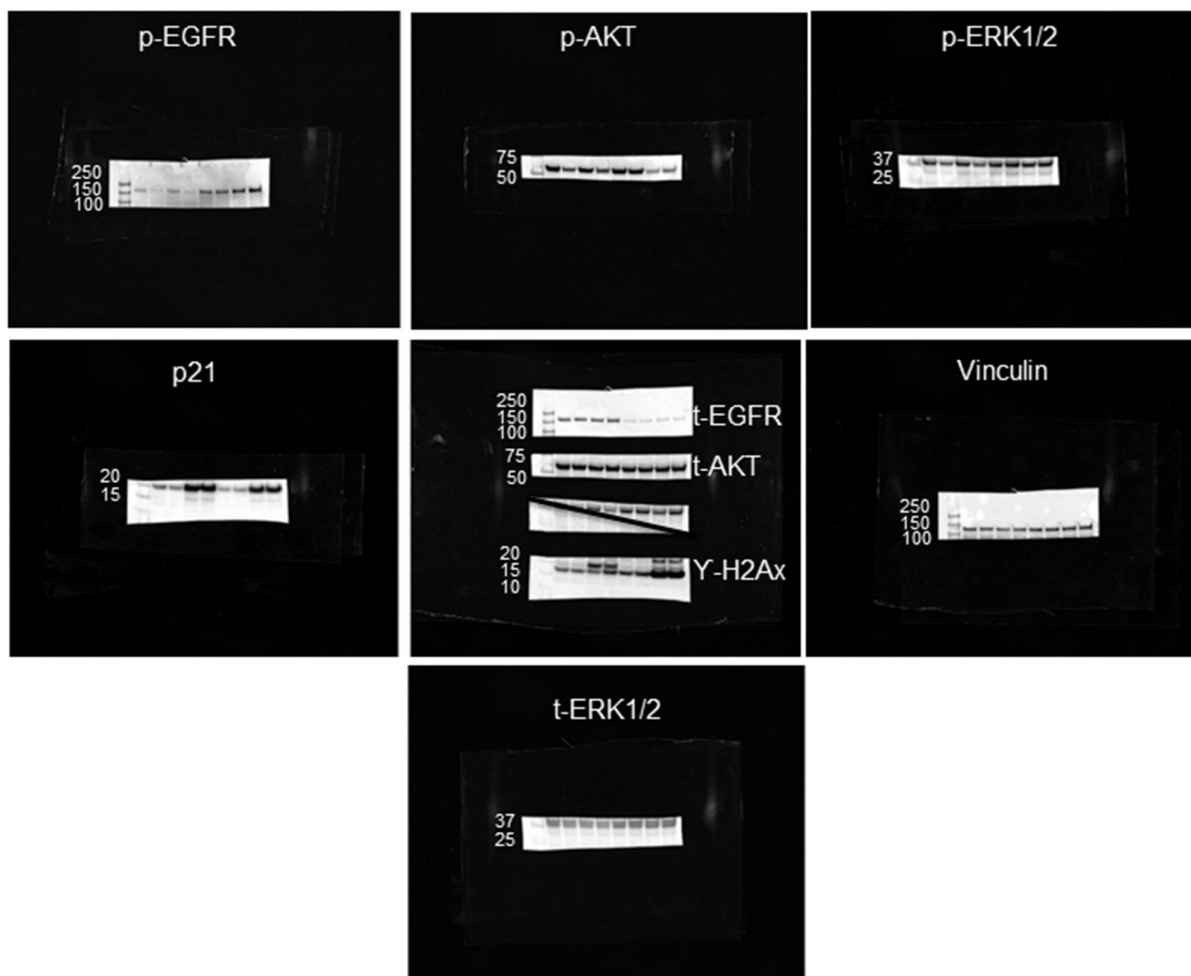

Figure S5. The uncropped Western blots.



**Table S1.** shRNA library details and screening candidate hit genes. (A) Genes composing the shRNA library, Ensembl annotation, drugs available targeting each gene and corresponding pathway/signaling or function are listed. (B) shRNAs targeting each gene are reported. For each cell line sequenced, LOG<sub>2</sub> ratio of each replicate was calculated; call for depletion in all three replicates; gene depletion call. (C) Expression levels expressed as TMM of each candidate gene hit in the CRC cell lines used for the synthetic lethal screening.

| Supplementary Table S1A. Genes composing the shRNA library, Ensembl annotation, drugs available targeting each gene and corresponding pathway/signaling or function. |                 |                           |                                |
|----------------------------------------------------------------------------------------------------------------------------------------------------------------------|-----------------|---------------------------|--------------------------------|
| Target_Gene                                                                                                                                                          | Ensembl Gene ID | Targeting Drug(s)         | Pathway/Signaling/Function     |
| ABL1                                                                                                                                                                 | ENSG00000097007 | adenosine-triphosphate    | RAS-ERK signaling pathway      |
|                                                                                                                                                                      |                 | bafetinib                 |                                |
|                                                                                                                                                                      |                 | bosutinib                 |                                |
|                                                                                                                                                                      |                 | dasatinib                 |                                |
|                                                                                                                                                                      |                 | flumatinib                |                                |
|                                                                                                                                                                      |                 | GNF-2                     |                                |
|                                                                                                                                                                      |                 | GZD824                    |                                |
|                                                                                                                                                                      |                 | imatinib                  |                                |
|                                                                                                                                                                      |                 | KW-2449                   |                                |
|                                                                                                                                                                      |                 | LDN-212854                |                                |
|                                                                                                                                                                      |                 | metatinib                 |                                |
|                                                                                                                                                                      |                 | nilotinib                 |                                |
|                                                                                                                                                                      |                 | ponatinib                 |                                |
|                                                                                                                                                                      |                 | PP-121                    |                                |
|                                                                                                                                                                      |                 | PP-2                      |                                |
|                                                                                                                                                                      |                 | rebastinib                |                                |
|                                                                                                                                                                      |                 | regorafenib               |                                |
|                                                                                                                                                                      |                 | saracatinib               |                                |
| ABL2                                                                                                                                                                 | ENSG00000143322 | adenosine-triphosphate    | RAS-ERK signaling pathway      |
|                                                                                                                                                                      |                 | dasatinib                 |                                |
| AKT1                                                                                                                                                                 | ENSG00000142208 | A-674563                  | HGF-MET-PI3K signaling pathway |
|                                                                                                                                                                      |                 | adenosine-triphosphate    |                                |
|                                                                                                                                                                      |                 | arsenic-trioxide          |                                |
|                                                                                                                                                                      |                 | AT13148                   |                                |
|                                                                                                                                                                      |                 | AZD5363                   |                                |
|                                                                                                                                                                      |                 | bisindolylmaleimide-ix    |                                |
|                                                                                                                                                                      |                 | BMS-536924                |                                |
|                                                                                                                                                                      |                 | BMS-754807                |                                |
|                                                                                                                                                                      |                 | CaMKII-IN-1               |                                |
|                                                                                                                                                                      |                 | canertinib                |                                |
|                                                                                                                                                                      |                 | enzastaurin               |                                |
|                                                                                                                                                                      |                 | GDC-0068                  |                                |
|                                                                                                                                                                      |                 | GSK2110183                |                                |
|                                                                                                                                                                      |                 | GSK690693                 |                                |
|                                                                                                                                                                      |                 | hexamethylenebisacetamide |                                |
|                                                                                                                                                                      |                 | KN-62                     |                                |
|                                                                                                                                                                      |                 | LY294002                  |                                |
|                                                                                                                                                                      |                 | MK-2206                   |                                |
|                                                                                                                                                                      |                 | PD-98059                  |                                |
|                                                                                                                                                                      |                 | perifosine                |                                |
|                                                                                                                                                                      |                 | SB-202190                 |                                |
|                                                                                                                                                                      |                 | SB-203580                 |                                |
|                                                                                                                                                                      |                 | TIC10                     |                                |

|      |                 |                                                                                                                                                                                                                                                                                                                                                                                                                                                                                                                                                                                                                                                                                                                                                       |  |  |                        |  |  |           |  |  |            |  |  |            |  |  |           |  |  |            |  |  |              |  |  |             |                                |  |            |  |  |             |  |  |             |                                |  |                     |  |  |            |  |  |                                |                           |  |                     |                                     |
|------|-----------------|-------------------------------------------------------------------------------------------------------------------------------------------------------------------------------------------------------------------------------------------------------------------------------------------------------------------------------------------------------------------------------------------------------------------------------------------------------------------------------------------------------------------------------------------------------------------------------------------------------------------------------------------------------------------------------------------------------------------------------------------------------|--|--|------------------------|--|--|-----------|--|--|------------|--|--|------------|--|--|-----------|--|--|------------|--|--|--------------|--|--|-------------|--------------------------------|--|------------|--|--|-------------|--|--|-------------|--------------------------------|--|---------------------|--|--|------------|--|--|--------------------------------|---------------------------|--|---------------------|-------------------------------------|
|      |                 | <tr><td></td><td></td><td>tricitabine</td></tr> <tr><td></td><td></td><td>U-0126</td></tr> <tr><td></td><td></td><td>uprosertib</td></tr>                                                                                                                                                                                                                                                                                                                                                                                                                                                                                                                                                                                                             |  |  | tricitabine            |  |  | U-0126    |  |  | uprosertib |  |  |            |  |  |           |  |  |            |  |  |              |  |  |             |                                |  |            |  |  |             |  |  |             |                                |  |                     |  |  |            |  |  |                                |                           |  |                     |                                     |
|      |                 | tricitabine                                                                                                                                                                                                                                                                                                                                                                                                                                                                                                                                                                                                                                                                                                                                           |  |  |                        |  |  |           |  |  |            |  |  |            |  |  |           |  |  |            |  |  |              |  |  |             |                                |  |            |  |  |             |  |  |             |                                |  |                     |  |  |            |  |  |                                |                           |  |                     |                                     |
|      |                 | U-0126                                                                                                                                                                                                                                                                                                                                                                                                                                                                                                                                                                                                                                                                                                                                                |  |  |                        |  |  |           |  |  |            |  |  |            |  |  |           |  |  |            |  |  |              |  |  |             |                                |  |            |  |  |             |  |  |             |                                |  |                     |  |  |            |  |  |                                |                           |  |                     |                                     |
|      |                 | uprosertib                                                                                                                                                                                                                                                                                                                                                                                                                                                                                                                                                                                                                                                                                                                                            |  |  |                        |  |  |           |  |  |            |  |  |            |  |  |           |  |  |            |  |  |              |  |  |             |                                |  |            |  |  |             |  |  |             |                                |  |                     |  |  |            |  |  |                                |                           |  |                     |                                     |
| AKT2 | ENSG00000105221 | <tr><td></td><td></td><td>ARQ-092</td></tr> <tr><td></td><td></td><td>AT13148</td></tr> <tr><td></td><td></td><td>AT7867</td></tr> <tr><td></td><td></td><td>AZD5363</td></tr> <tr><td></td><td></td><td>GDC-0068</td></tr> <tr><td></td><td></td><td>GSK2110183</td></tr> <tr><td></td><td></td><td>GSK690693</td></tr> <tr><td></td><td></td><td>MK-2206</td></tr> <tr><td></td><td></td><td>PHT-427</td></tr> <tr><td></td><td></td><td>tricitabine</td></tr> <tr><td></td><td></td><td>uprosertib</td></tr>                                                                                                                                                                                                                                       |  |  | ARQ-092                |  |  | AT13148   |  |  | AT7867     |  |  | AZD5363    |  |  | GDC-0068  |  |  | GSK2110183 |  |  | GSK690693    |  |  | MK-2206     |                                |  | PHT-427    |  |  | tricitabine |  |  | uprosertib  | HGF-MET-PI3K signaling pathway |  |                     |  |  |            |  |  |                                |                           |  |                     |                                     |
|      |                 | ARQ-092                                                                                                                                                                                                                                                                                                                                                                                                                                                                                                                                                                                                                                                                                                                                               |  |  |                        |  |  |           |  |  |            |  |  |            |  |  |           |  |  |            |  |  |              |  |  |             |                                |  |            |  |  |             |  |  |             |                                |  |                     |  |  |            |  |  |                                |                           |  |                     |                                     |
|      |                 | AT13148                                                                                                                                                                                                                                                                                                                                                                                                                                                                                                                                                                                                                                                                                                                                               |  |  |                        |  |  |           |  |  |            |  |  |            |  |  |           |  |  |            |  |  |              |  |  |             |                                |  |            |  |  |             |  |  |             |                                |  |                     |  |  |            |  |  |                                |                           |  |                     |                                     |
|      |                 | AT7867                                                                                                                                                                                                                                                                                                                                                                                                                                                                                                                                                                                                                                                                                                                                                |  |  |                        |  |  |           |  |  |            |  |  |            |  |  |           |  |  |            |  |  |              |  |  |             |                                |  |            |  |  |             |  |  |             |                                |  |                     |  |  |            |  |  |                                |                           |  |                     |                                     |
|      |                 | AZD5363                                                                                                                                                                                                                                                                                                                                                                                                                                                                                                                                                                                                                                                                                                                                               |  |  |                        |  |  |           |  |  |            |  |  |            |  |  |           |  |  |            |  |  |              |  |  |             |                                |  |            |  |  |             |  |  |             |                                |  |                     |  |  |            |  |  |                                |                           |  |                     |                                     |
|      |                 | GDC-0068                                                                                                                                                                                                                                                                                                                                                                                                                                                                                                                                                                                                                                                                                                                                              |  |  |                        |  |  |           |  |  |            |  |  |            |  |  |           |  |  |            |  |  |              |  |  |             |                                |  |            |  |  |             |  |  |             |                                |  |                     |  |  |            |  |  |                                |                           |  |                     |                                     |
|      |                 | GSK2110183                                                                                                                                                                                                                                                                                                                                                                                                                                                                                                                                                                                                                                                                                                                                            |  |  |                        |  |  |           |  |  |            |  |  |            |  |  |           |  |  |            |  |  |              |  |  |             |                                |  |            |  |  |             |  |  |             |                                |  |                     |  |  |            |  |  |                                |                           |  |                     |                                     |
|      |                 | GSK690693                                                                                                                                                                                                                                                                                                                                                                                                                                                                                                                                                                                                                                                                                                                                             |  |  |                        |  |  |           |  |  |            |  |  |            |  |  |           |  |  |            |  |  |              |  |  |             |                                |  |            |  |  |             |  |  |             |                                |  |                     |  |  |            |  |  |                                |                           |  |                     |                                     |
|      |                 | MK-2206                                                                                                                                                                                                                                                                                                                                                                                                                                                                                                                                                                                                                                                                                                                                               |  |  |                        |  |  |           |  |  |            |  |  |            |  |  |           |  |  |            |  |  |              |  |  |             |                                |  |            |  |  |             |  |  |             |                                |  |                     |  |  |            |  |  |                                |                           |  |                     |                                     |
|      |                 | PHT-427                                                                                                                                                                                                                                                                                                                                                                                                                                                                                                                                                                                                                                                                                                                                               |  |  |                        |  |  |           |  |  |            |  |  |            |  |  |           |  |  |            |  |  |              |  |  |             |                                |  |            |  |  |             |  |  |             |                                |  |                     |  |  |            |  |  |                                |                           |  |                     |                                     |
|      |                 | tricitabine                                                                                                                                                                                                                                                                                                                                                                                                                                                                                                                                                                                                                                                                                                                                           |  |  |                        |  |  |           |  |  |            |  |  |            |  |  |           |  |  |            |  |  |              |  |  |             |                                |  |            |  |  |             |  |  |             |                                |  |                     |  |  |            |  |  |                                |                           |  |                     |                                     |
|      |                 | uprosertib                                                                                                                                                                                                                                                                                                                                                                                                                                                                                                                                                                                                                                                                                                                                            |  |  |                        |  |  |           |  |  |            |  |  |            |  |  |           |  |  |            |  |  |              |  |  |             |                                |  |            |  |  |             |  |  |             |                                |  |                     |  |  |            |  |  |                                |                           |  |                     |                                     |
| AKT3 | ENSG00000117020 | <tr><td></td><td></td><td>AT13148</td></tr> <tr><td></td><td></td><td>AZD5363</td></tr> <tr><td></td><td></td><td>GDC-0068</td></tr> <tr><td></td><td></td><td>GSK2110183</td></tr> <tr><td></td><td></td><td>GSK690693</td></tr> <tr><td></td><td></td><td>MK-2206</td></tr> <tr><td></td><td></td><td>tricitabine</td></tr> <tr><td></td><td></td><td>uprosertib</td></tr>                                                                                                                                                                                                                                                                                                                                                                          |  |  | AT13148                |  |  | AZD5363   |  |  | GDC-0068   |  |  | GSK2110183 |  |  | GSK690693 |  |  | MK-2206    |  |  | tricitabine  |  |  | uprosertib  | HGF-MET-PI3K signaling pathway |  |            |  |  |             |  |  |             |                                |  |                     |  |  |            |  |  |                                |                           |  |                     |                                     |
|      |                 | AT13148                                                                                                                                                                                                                                                                                                                                                                                                                                                                                                                                                                                                                                                                                                                                               |  |  |                        |  |  |           |  |  |            |  |  |            |  |  |           |  |  |            |  |  |              |  |  |             |                                |  |            |  |  |             |  |  |             |                                |  |                     |  |  |            |  |  |                                |                           |  |                     |                                     |
|      |                 | AZD5363                                                                                                                                                                                                                                                                                                                                                                                                                                                                                                                                                                                                                                                                                                                                               |  |  |                        |  |  |           |  |  |            |  |  |            |  |  |           |  |  |            |  |  |              |  |  |             |                                |  |            |  |  |             |  |  |             |                                |  |                     |  |  |            |  |  |                                |                           |  |                     |                                     |
|      |                 | GDC-0068                                                                                                                                                                                                                                                                                                                                                                                                                                                                                                                                                                                                                                                                                                                                              |  |  |                        |  |  |           |  |  |            |  |  |            |  |  |           |  |  |            |  |  |              |  |  |             |                                |  |            |  |  |             |  |  |             |                                |  |                     |  |  |            |  |  |                                |                           |  |                     |                                     |
|      |                 | GSK2110183                                                                                                                                                                                                                                                                                                                                                                                                                                                                                                                                                                                                                                                                                                                                            |  |  |                        |  |  |           |  |  |            |  |  |            |  |  |           |  |  |            |  |  |              |  |  |             |                                |  |            |  |  |             |  |  |             |                                |  |                     |  |  |            |  |  |                                |                           |  |                     |                                     |
|      |                 | GSK690693                                                                                                                                                                                                                                                                                                                                                                                                                                                                                                                                                                                                                                                                                                                                             |  |  |                        |  |  |           |  |  |            |  |  |            |  |  |           |  |  |            |  |  |              |  |  |             |                                |  |            |  |  |             |  |  |             |                                |  |                     |  |  |            |  |  |                                |                           |  |                     |                                     |
|      |                 | MK-2206                                                                                                                                                                                                                                                                                                                                                                                                                                                                                                                                                                                                                                                                                                                                               |  |  |                        |  |  |           |  |  |            |  |  |            |  |  |           |  |  |            |  |  |              |  |  |             |                                |  |            |  |  |             |  |  |             |                                |  |                     |  |  |            |  |  |                                |                           |  |                     |                                     |
|      |                 | tricitabine                                                                                                                                                                                                                                                                                                                                                                                                                                                                                                                                                                                                                                                                                                                                           |  |  |                        |  |  |           |  |  |            |  |  |            |  |  |           |  |  |            |  |  |              |  |  |             |                                |  |            |  |  |             |  |  |             |                                |  |                     |  |  |            |  |  |                                |                           |  |                     |                                     |
|      |                 | uprosertib                                                                                                                                                                                                                                                                                                                                                                                                                                                                                                                                                                                                                                                                                                                                            |  |  |                        |  |  |           |  |  |            |  |  |            |  |  |           |  |  |            |  |  |              |  |  |             |                                |  |            |  |  |             |  |  |             |                                |  |                     |  |  |            |  |  |                                |                           |  |                     |                                     |
| ALK  | ENSG00000171094 | <tr><td></td><td></td><td>adenosine-triphosphate</td></tr> <tr><td></td><td></td><td>alectinib</td></tr> <tr><td></td><td></td><td>AP26113</td></tr> <tr><td></td><td></td><td>ASP3026</td></tr> <tr><td></td><td></td><td>AZD3463</td></tr> <tr><td></td><td></td><td>brigatinib</td></tr> <tr><td></td><td></td><td>CEP-37440</td></tr> <tr><td></td><td></td><td>ceritinib</td></tr> <tr><td></td><td></td><td>crizotinib</td></tr> <tr><td></td><td></td><td>entrectinib</td></tr> <tr><td></td><td></td><td>GSK1838705A</td></tr> <tr><td></td><td></td><td>lorlatinib</td></tr> <tr><td></td><td></td><td>NVP-TAE684</td></tr> <tr><td></td><td></td><td>PF-06463922</td></tr>                                                                  |  |  | adenosine-triphosphate |  |  | alectinib |  |  | AP26113    |  |  | ASP3026    |  |  | AZD3463   |  |  | brigatinib |  |  | CEP-37440    |  |  | ceritinib   |                                |  | crizotinib |  |  | entrectinib |  |  | GSK1838705A |                                |  | lorlatinib          |  |  | NVP-TAE684 |  |  | PF-06463922                    | RAS-ERK signaling pathway |  |                     |                                     |
|      |                 | adenosine-triphosphate                                                                                                                                                                                                                                                                                                                                                                                                                                                                                                                                                                                                                                                                                                                                |  |  |                        |  |  |           |  |  |            |  |  |            |  |  |           |  |  |            |  |  |              |  |  |             |                                |  |            |  |  |             |  |  |             |                                |  |                     |  |  |            |  |  |                                |                           |  |                     |                                     |
|      |                 | alectinib                                                                                                                                                                                                                                                                                                                                                                                                                                                                                                                                                                                                                                                                                                                                             |  |  |                        |  |  |           |  |  |            |  |  |            |  |  |           |  |  |            |  |  |              |  |  |             |                                |  |            |  |  |             |  |  |             |                                |  |                     |  |  |            |  |  |                                |                           |  |                     |                                     |
|      |                 | AP26113                                                                                                                                                                                                                                                                                                                                                                                                                                                                                                                                                                                                                                                                                                                                               |  |  |                        |  |  |           |  |  |            |  |  |            |  |  |           |  |  |            |  |  |              |  |  |             |                                |  |            |  |  |             |  |  |             |                                |  |                     |  |  |            |  |  |                                |                           |  |                     |                                     |
|      |                 | ASP3026                                                                                                                                                                                                                                                                                                                                                                                                                                                                                                                                                                                                                                                                                                                                               |  |  |                        |  |  |           |  |  |            |  |  |            |  |  |           |  |  |            |  |  |              |  |  |             |                                |  |            |  |  |             |  |  |             |                                |  |                     |  |  |            |  |  |                                |                           |  |                     |                                     |
|      |                 | AZD3463                                                                                                                                                                                                                                                                                                                                                                                                                                                                                                                                                                                                                                                                                                                                               |  |  |                        |  |  |           |  |  |            |  |  |            |  |  |           |  |  |            |  |  |              |  |  |             |                                |  |            |  |  |             |  |  |             |                                |  |                     |  |  |            |  |  |                                |                           |  |                     |                                     |
|      |                 | brigatinib                                                                                                                                                                                                                                                                                                                                                                                                                                                                                                                                                                                                                                                                                                                                            |  |  |                        |  |  |           |  |  |            |  |  |            |  |  |           |  |  |            |  |  |              |  |  |             |                                |  |            |  |  |             |  |  |             |                                |  |                     |  |  |            |  |  |                                |                           |  |                     |                                     |
|      |                 | CEP-37440                                                                                                                                                                                                                                                                                                                                                                                                                                                                                                                                                                                                                                                                                                                                             |  |  |                        |  |  |           |  |  |            |  |  |            |  |  |           |  |  |            |  |  |              |  |  |             |                                |  |            |  |  |             |  |  |             |                                |  |                     |  |  |            |  |  |                                |                           |  |                     |                                     |
|      |                 | ceritinib                                                                                                                                                                                                                                                                                                                                                                                                                                                                                                                                                                                                                                                                                                                                             |  |  |                        |  |  |           |  |  |            |  |  |            |  |  |           |  |  |            |  |  |              |  |  |             |                                |  |            |  |  |             |  |  |             |                                |  |                     |  |  |            |  |  |                                |                           |  |                     |                                     |
|      |                 | crizotinib                                                                                                                                                                                                                                                                                                                                                                                                                                                                                                                                                                                                                                                                                                                                            |  |  |                        |  |  |           |  |  |            |  |  |            |  |  |           |  |  |            |  |  |              |  |  |             |                                |  |            |  |  |             |  |  |             |                                |  |                     |  |  |            |  |  |                                |                           |  |                     |                                     |
|      |                 | entrectinib                                                                                                                                                                                                                                                                                                                                                                                                                                                                                                                                                                                                                                                                                                                                           |  |  |                        |  |  |           |  |  |            |  |  |            |  |  |           |  |  |            |  |  |              |  |  |             |                                |  |            |  |  |             |  |  |             |                                |  |                     |  |  |            |  |  |                                |                           |  |                     |                                     |
|      |                 | GSK1838705A                                                                                                                                                                                                                                                                                                                                                                                                                                                                                                                                                                                                                                                                                                                                           |  |  |                        |  |  |           |  |  |            |  |  |            |  |  |           |  |  |            |  |  |              |  |  |             |                                |  |            |  |  |             |  |  |             |                                |  |                     |  |  |            |  |  |                                |                           |  |                     |                                     |
|      |                 | lorlatinib                                                                                                                                                                                                                                                                                                                                                                                                                                                                                                                                                                                                                                                                                                                                            |  |  |                        |  |  |           |  |  |            |  |  |            |  |  |           |  |  |            |  |  |              |  |  |             |                                |  |            |  |  |             |  |  |             |                                |  |                     |  |  |            |  |  |                                |                           |  |                     |                                     |
|      |                 | NVP-TAE684                                                                                                                                                                                                                                                                                                                                                                                                                                                                                                                                                                                                                                                                                                                                            |  |  |                        |  |  |           |  |  |            |  |  |            |  |  |           |  |  |            |  |  |              |  |  |             |                                |  |            |  |  |             |  |  |             |                                |  |                     |  |  |            |  |  |                                |                           |  |                     |                                     |
|      |                 | PF-06463922                                                                                                                                                                                                                                                                                                                                                                                                                                                                                                                                                                                                                                                                                                                                           |  |  |                        |  |  |           |  |  |            |  |  |            |  |  |           |  |  |            |  |  |              |  |  |             |                                |  |            |  |  |             |  |  |             |                                |  |                     |  |  |            |  |  |                                |                           |  |                     |                                     |
| AR   | ENSG00000169083 | <tr><td></td><td></td><td>andarine</td></tr> <tr><td></td><td></td><td>APC-100</td></tr> <tr><td></td><td></td><td>apigenin</td></tr> <tr><td></td><td></td><td>ARN-509</td></tr> <tr><td></td><td></td><td>ASC-J9</td></tr> <tr><td></td><td></td><td>AZD3514</td></tr> <tr><td></td><td></td><td>bicalutamide</td></tr> <tr><td></td><td></td><td>bisphenol-a</td></tr> <tr><td></td><td></td><td>CB-03-01</td></tr> <tr><td></td><td></td><td>cortodoxone</td></tr> <tr><td></td><td></td><td>cyproterone</td></tr> <tr><td></td><td></td><td>cyproterone-acetate</td></tr> <tr><td></td><td></td><td>danazol</td></tr> <tr><td></td><td></td><td>dehydroepiandrosterone-sulfate</td></tr> <tr><td></td><td></td><td>dihydrotestosterone</td></tr> |  |  | andarine               |  |  | APC-100   |  |  | apigenin   |  |  | ARN-509    |  |  | ASC-J9    |  |  | AZD3514    |  |  | bicalutamide |  |  | bisphenol-a |                                |  | CB-03-01   |  |  | cortodoxone |  |  | cyproterone |                                |  | cyproterone-acetate |  |  | danazol    |  |  | dehydroepiandrosterone-sulfate |                           |  | dihydrotestosterone | Androgen receptor signaling pathway |
|      |                 | andarine                                                                                                                                                                                                                                                                                                                                                                                                                                                                                                                                                                                                                                                                                                                                              |  |  |                        |  |  |           |  |  |            |  |  |            |  |  |           |  |  |            |  |  |              |  |  |             |                                |  |            |  |  |             |  |  |             |                                |  |                     |  |  |            |  |  |                                |                           |  |                     |                                     |
|      |                 | APC-100                                                                                                                                                                                                                                                                                                                                                                                                                                                                                                                                                                                                                                                                                                                                               |  |  |                        |  |  |           |  |  |            |  |  |            |  |  |           |  |  |            |  |  |              |  |  |             |                                |  |            |  |  |             |  |  |             |                                |  |                     |  |  |            |  |  |                                |                           |  |                     |                                     |
|      |                 | apigenin                                                                                                                                                                                                                                                                                                                                                                                                                                                                                                                                                                                                                                                                                                                                              |  |  |                        |  |  |           |  |  |            |  |  |            |  |  |           |  |  |            |  |  |              |  |  |             |                                |  |            |  |  |             |  |  |             |                                |  |                     |  |  |            |  |  |                                |                           |  |                     |                                     |
|      |                 | ARN-509                                                                                                                                                                                                                                                                                                                                                                                                                                                                                                                                                                                                                                                                                                                                               |  |  |                        |  |  |           |  |  |            |  |  |            |  |  |           |  |  |            |  |  |              |  |  |             |                                |  |            |  |  |             |  |  |             |                                |  |                     |  |  |            |  |  |                                |                           |  |                     |                                     |
|      |                 | ASC-J9                                                                                                                                                                                                                                                                                                                                                                                                                                                                                                                                                                                                                                                                                                                                                |  |  |                        |  |  |           |  |  |            |  |  |            |  |  |           |  |  |            |  |  |              |  |  |             |                                |  |            |  |  |             |  |  |             |                                |  |                     |  |  |            |  |  |                                |                           |  |                     |                                     |
|      |                 | AZD3514                                                                                                                                                                                                                                                                                                                                                                                                                                                                                                                                                                                                                                                                                                                                               |  |  |                        |  |  |           |  |  |            |  |  |            |  |  |           |  |  |            |  |  |              |  |  |             |                                |  |            |  |  |             |  |  |             |                                |  |                     |  |  |            |  |  |                                |                           |  |                     |                                     |
|      |                 | bicalutamide                                                                                                                                                                                                                                                                                                                                                                                                                                                                                                                                                                                                                                                                                                                                          |  |  |                        |  |  |           |  |  |            |  |  |            |  |  |           |  |  |            |  |  |              |  |  |             |                                |  |            |  |  |             |  |  |             |                                |  |                     |  |  |            |  |  |                                |                           |  |                     |                                     |
|      |                 | bisphenol-a                                                                                                                                                                                                                                                                                                                                                                                                                                                                                                                                                                                                                                                                                                                                           |  |  |                        |  |  |           |  |  |            |  |  |            |  |  |           |  |  |            |  |  |              |  |  |             |                                |  |            |  |  |             |  |  |             |                                |  |                     |  |  |            |  |  |                                |                           |  |                     |                                     |
|      |                 | CB-03-01                                                                                                                                                                                                                                                                                                                                                                                                                                                                                                                                                                                                                                                                                                                                              |  |  |                        |  |  |           |  |  |            |  |  |            |  |  |           |  |  |            |  |  |              |  |  |             |                                |  |            |  |  |             |  |  |             |                                |  |                     |  |  |            |  |  |                                |                           |  |                     |                                     |
|      |                 | cortodoxone                                                                                                                                                                                                                                                                                                                                                                                                                                                                                                                                                                                                                                                                                                                                           |  |  |                        |  |  |           |  |  |            |  |  |            |  |  |           |  |  |            |  |  |              |  |  |             |                                |  |            |  |  |             |  |  |             |                                |  |                     |  |  |            |  |  |                                |                           |  |                     |                                     |
|      |                 | cyproterone                                                                                                                                                                                                                                                                                                                                                                                                                                                                                                                                                                                                                                                                                                                                           |  |  |                        |  |  |           |  |  |            |  |  |            |  |  |           |  |  |            |  |  |              |  |  |             |                                |  |            |  |  |             |  |  |             |                                |  |                     |  |  |            |  |  |                                |                           |  |                     |                                     |
|      |                 | cyproterone-acetate                                                                                                                                                                                                                                                                                                                                                                                                                                                                                                                                                                                                                                                                                                                                   |  |  |                        |  |  |           |  |  |            |  |  |            |  |  |           |  |  |            |  |  |              |  |  |             |                                |  |            |  |  |             |  |  |             |                                |  |                     |  |  |            |  |  |                                |                           |  |                     |                                     |
|      |                 | danazol                                                                                                                                                                                                                                                                                                                                                                                                                                                                                                                                                                                                                                                                                                                                               |  |  |                        |  |  |           |  |  |            |  |  |            |  |  |           |  |  |            |  |  |              |  |  |             |                                |  |            |  |  |             |  |  |             |                                |  |                     |  |  |            |  |  |                                |                           |  |                     |                                     |
|      |                 | dehydroepiandrosterone-sulfate                                                                                                                                                                                                                                                                                                                                                                                                                                                                                                                                                                                                                                                                                                                        |  |  |                        |  |  |           |  |  |            |  |  |            |  |  |           |  |  |            |  |  |              |  |  |             |                                |  |            |  |  |             |  |  |             |                                |  |                     |  |  |            |  |  |                                |                           |  |                     |                                     |
|      |                 | dihydrotestosterone                                                                                                                                                                                                                                                                                                                                                                                                                                                                                                                                                                                                                                                                                                                                   |  |  |                        |  |  |           |  |  |            |  |  |            |  |  |           |  |  |            |  |  |              |  |  |             |                                |  |            |  |  |             |  |  |             |                                |  |                     |  |  |            |  |  |                                |                           |  |                     |                                     |

|     |                 |                                                                                                                                                                                                                                                                                                                                                                                                                                                                                                                                                                                                                                                                                                                            |                  |
|-----|-----------------|----------------------------------------------------------------------------------------------------------------------------------------------------------------------------------------------------------------------------------------------------------------------------------------------------------------------------------------------------------------------------------------------------------------------------------------------------------------------------------------------------------------------------------------------------------------------------------------------------------------------------------------------------------------------------------------------------------------------------|------------------|
|     |                 | dromostanolone-propionate<br>drospirenone<br>enzalutamide<br>epitiostanol<br>eugenol<br>fludrocortisone-acetate<br>flufenamic-acid<br>fluoxymesterone<br>flutamide<br>galeterone<br>gestrinone<br>GLPG0492<br>GLPG0492-R-enantiomer<br>kaempferol<br>ketoconazole<br>levonorgestrel<br>LXR-623<br>LY2452473<br>mifepristone<br>MK-0773<br>nandrolone<br>nandrolone-decanoate<br>nilutamide<br>ODM-201<br>ostarine<br>oxandrolone<br>oxymetholone<br>PS178990<br>pyrvinium-pamoate<br>RU-58841<br>spironolactone<br>stanozolol<br>testosterone<br>testosterone-enanthate<br>testosterone-propionate<br>testosterone-undecanoate<br>17-alpha-methyltestosterone<br>17-hydroxyprogesterone-<br>caproate<br>2-hydroxyflutamide |                  |
| ATM | ENSG00000149311 | cafeine<br>CGK-733<br>KU-55933<br>KU-60019<br>VE-822                                                                                                                                                                                                                                                                                                                                                                                                                                                                                                                                                                                                                                                                       | ATM-TP53 pathway |
| ATR | ENSG00000175054 | AZD6738<br>AZ20<br>CGK-733<br>NVP-BEZ235<br>schisandrin-b<br>VE-821                                                                                                                                                                                                                                                                                                                                                                                                                                                                                                                                                                                                                                                        | ATR-TP53 pathway |

|       |                 |                      |                       |
|-------|-----------------|----------------------|-----------------------|
|       |                 | VE-822               |                       |
|       |                 | alisertib            |                       |
|       |                 | AMG900               |                       |
|       |                 | AT-9283              |                       |
|       |                 | aurora-a-inhibitor-i |                       |
|       |                 | barasertib           |                       |
|       |                 | BI-847325            |                       |
|       |                 | CCT129202            |                       |
|       |                 | CCT137690            |                       |
|       |                 | CYC116               |                       |
|       |                 | danusertib           |                       |
|       |                 | ENMD-2076            |                       |
| AURKA | ENSG00000087586 | GSK1070916           | PI3K-AKT-MTOR pathway |
|       |                 | JNJ-7706621          |                       |
|       |                 | KW-2449              |                       |
|       |                 | MK-5108              |                       |
|       |                 | MK-8745              |                       |
|       |                 | MLN-8054             |                       |
|       |                 | orantinib            |                       |
|       |                 | PF-03814735          |                       |
|       |                 | PHA-680632           |                       |
|       |                 | SNS-314              |                       |
|       |                 | tozasertib           |                       |
|       |                 | ZM-447439            |                       |
|       |                 | AMG900               |                       |
|       |                 | AT-9283              |                       |
|       |                 | barasertib           |                       |
|       |                 | barasertib-HQPA      |                       |
|       |                 | BI-847325            |                       |
|       |                 | CCT129202            |                       |
|       |                 | CCT137690            |                       |
|       |                 | CGP-57380            |                       |
|       |                 | CYC116               |                       |
|       |                 | danusertib           |                       |
|       |                 | GSK1070916           |                       |
| AURKB | ENSG00000178999 | hesperadin           | PI3K-AKT-MTOR pathway |
|       |                 | JNJ-7706621          |                       |
|       |                 | KW-2449              |                       |
|       |                 | MK-5108              |                       |
|       |                 | orantinib            |                       |
|       |                 | PF-03814735          |                       |
|       |                 | PHA-680632           |                       |
|       |                 | reversine            |                       |
|       |                 | SNS-314              |                       |
|       |                 | TAK-901              |                       |
|       |                 | tozasertib           |                       |
|       |                 | ZM-447439            |                       |
|       |                 | AMG900               |                       |
| AURKC | ENSG00000105146 | BI-847325            | PI3K-AKT-MTOR pathway |
|       |                 | CCT129202            |                       |
|       |                 | CCT137690            |                       |

|       |                 |                                                                                                                                                                                                |                               |
|-------|-----------------|------------------------------------------------------------------------------------------------------------------------------------------------------------------------------------------------|-------------------------------|
|       |                 | danusertib<br>GSK1070916<br>MK-5108<br>PHA-680632<br>SNS-314<br>tozasertib                                                                                                                     |                               |
| AXL   | ENSG00000167601 | BMS-777607<br>LDC1267<br>MGCD-265<br>R-428<br>TP-0903                                                                                                                                          | RAS-ERK signaling pathway     |
| BCL2  | ENSG00000171791 | ABT-737<br>docetaxel<br>edaravone<br>gambogic-acid<br>gossypol<br>HA-14-1<br>HA14-1<br>ibuprofen-(s)<br>navitoclax<br>obatoclax<br>oridonin<br>paclitaxel<br>rasagiline<br>TW-37<br>venetoclax | BCL2 Family                   |
| BCR   | ENSG00000186716 | bafetinib<br>bosutinib<br>GNF-2<br>GZD824<br>metatinib<br>ponatinib<br>rebastinib                                                                                                              | RAS-ERK signaling pathway     |
| BIRC5 | ENSG00000089685 | terameproclo<br>YM-155                                                                                                                                                                         | Wnt signaling pathway         |
| BLK   | ENSG00000136573 | dasatinib<br>ibrutinib                                                                                                                                                                         | SRC tyrosin kinase signaling  |
| BMX   | ENSG00000102010 | ibrutinib                                                                                                                                                                                      | SRC tyrosin kinase signaling  |
| BRAF  | ENSG00000157764 | AZ-628<br>CEP-32496<br>dabrafenib<br>GDC-0879<br>LGX818<br>LY3009120<br>PLX-4720<br>PLX8394<br>RAF265<br>regorafenib<br>Ro-5126766<br>SB-590885<br>sorafenib<br>TAK-632                        | BRAF to ERK signaling pathway |

|       |                 |                                                                                                                                                                                                                                                   |                                              |
|-------|-----------------|---------------------------------------------------------------------------------------------------------------------------------------------------------------------------------------------------------------------------------------------------|----------------------------------------------|
|       |                 | vemurafenib<br>ZM-336372                                                                                                                                                                                                                          |                                              |
| BRD4  | ENSG00000141867 | ARV-825<br>BI-2536<br>CPI-0610<br>CPI-203<br>I-BET-762<br>I-BET151<br>JQ1-(+)<br>LY303511<br>OTX015<br>PFI-1<br>TG-101348                                                                                                                         | Bromodomain and extra terminal domain family |
| BTK   | ENSG00000010671 | acalabrutinib<br>AVL-292<br>CNX-774<br>GDC-0834<br>ibrutinib<br>LFM-A13<br>olmutinib<br>ONO-4059<br>terreic-acid-(-)<br>amygdalin<br>AZ-10417808<br>DBeQ                                                                                          | NFKB pathway                                 |
| CASP3 | ENSG00000164305 | minocycline<br>NQDI-1<br>PAC-1<br>PETCM                                                                                                                                                                                                           | TNF signaling pathway                        |
| CCR5  | ENSG00000160791 | sanguinarium-chloride<br>adaptavir<br>maraviroc<br>TAK-220<br>vicriviroc                                                                                                                                                                          | NFKB/PI3K/MAPK pathways                      |
| CD274 | ENSG00000120217 | PD1-PDL-inhibitor-1                                                                                                                                                                                                                               | PDL1-PD1 pathway                             |
| CDK1  | ENSG00000170312 | alvocidib<br>aminopurvalanol-a<br>AT-7519<br>BMS-265246<br>CDK1-5-inhibitor<br>CHIR-99021<br>dinaciclib<br>indirubin<br>indirubin-3-monoxime<br>JNJ-7706621<br>kenpaullone<br>olomoucine<br>PF-573228<br>PHA-767491<br>PHA-793887<br>purvalanol-a | Cell cycle regulator                         |

|      |                 |                                                                                                                                                                                                                                                                                                                                                                                                               |                      |
|------|-----------------|---------------------------------------------------------------------------------------------------------------------------------------------------------------------------------------------------------------------------------------------------------------------------------------------------------------------------------------------------------------------------------------------------------------|----------------------|
|      |                 | P276-00<br>RGB-286638<br>R547<br>SU9516<br>terameprocol<br>TG-02<br>1-azakenpaullone<br>8-hydroxy-DPAT                                                                                                                                                                                                                                                                                                        |                      |
|      |                 | AG-555<br>alvocidib<br>aminopurvalanol-a<br>AT-7519<br>BMS-265246<br>BMS-387032<br>BMS-536924<br>bosutinib<br>BX-795<br>BX-912<br>dinaciclib<br>indirubin-3-monoxime<br>JNJ-7706621<br>NSC-625987<br>NU6027<br>olomoucine<br>PF-573228<br>PHA-793887<br>PHA-848125<br>purvalanol-a<br>purvalanol-b<br>RGB-286638<br>roscovitine<br>RX-3117<br>ryuvidine<br>R547<br>SB-216763<br>SCH-900776<br>SU9516<br>TG-02 |                      |
| CDK2 | ENSG00000123374 |                                                                                                                                                                                                                                                                                                                                                                                                               | Cell cycle regulator |
|      |                 | alvocidib<br>AMG-925<br>arcyriaflavin-a<br>AT-7519<br>LY2835219<br>NSC-625987<br>ON123300<br>palbociclib<br>PHA-793887<br>PHA-848125<br>purvalanol-a<br>purvalanol-b<br>P276-00<br>RGB-286638                                                                                                                                                                                                                 |                      |
| CDK4 | ENSG00000135446 |                                                                                                                                                                                                                                                                                                                                                                                                               | Cell cycle regulator |

|       |                 |                                                                                                                                                        |                      |
|-------|-----------------|--------------------------------------------------------------------------------------------------------------------------------------------------------|----------------------|
|       |                 | ribociclib<br>ryuvidine<br>R547<br>SU9516                                                                                                              |                      |
| CDK6  | ENSG00000105810 | alvocidib<br>AMG-925<br>aminopurvalanol-a<br>apigenin<br>AT-7519<br>chrysin<br>fisetin<br>LY2835219<br>palbociclib<br>RGB-286638<br>ribociclib         | Cell cycle regulator |
| CDK7  | ENSG00000134058 | alvocidib<br>BMS-387032<br>BS-181<br>PF-573228<br>PHA-793887<br>PHA-848125<br>RGB-286638<br>R547<br>TG-02<br>THZ1<br>THZ1-R<br>THZ2                    | Cell cycle regulator |
| CDK9  | ENSG00000136807 | alvocidib<br>AT-7519<br>BMS-387032<br>CDK9-IN-6<br>dinaciclib<br>LY2857785<br>PHA-793887<br>P276-00<br>RGB-286638<br>roscovitine<br>TG-02              | Cell cycle regulator |
| CHEK1 | ENSG00000149554 | AZD7762<br>BX-795<br>BX-912<br>CHIR-124<br>KN-62<br>LY2603618<br>LY2606368<br>LY294002<br>PD-98059<br>PF-477736<br>SB-202190<br>SB-203580<br>SB-218078 | ATR pathway          |



|        |                 |                                                                                                                                                                                                                                                                                                                                                                                       |                           |
|--------|-----------------|---------------------------------------------------------------------------------------------------------------------------------------------------------------------------------------------------------------------------------------------------------------------------------------------------------------------------------------------------------------------------------------|---------------------------|
|        |                 | SCH-900776<br>U-0126<br>7-hydroxystaurosporine<br>8-hydroxy-DPAT                                                                                                                                                                                                                                                                                                                      |                           |
| CHEK2  | ENSG00000183765 | AZD7762<br>PF-477736<br>8-hydroxy-DPAT                                                                                                                                                                                                                                                                                                                                                | ATM pathway               |
| CREBBP | ENSG00000005339 | SGC-CBP30                                                                                                                                                                                                                                                                                                                                                                             | RAS-ERK pathway           |
| CTNNB1 | ENSG00000168036 | ICG-001<br>PNU-74654<br>urea                                                                                                                                                                                                                                                                                                                                                          | Wnt signaling pathway     |
| DHFR   | ENSG00000228716 | aminopterin<br>chlorproguanil<br>coenzyme-i<br>dapsone<br>methotrexate<br>pemetrexed<br>pralatrexate<br>proguanil<br>pyrimethamine<br>succinylsulfathiazole<br>sulfameter<br>trimethoprim                                                                                                                                                                                             | Reductase family          |
| DOT1L  | ENSG00000104885 | EPZ-5676<br>EPZ004777                                                                                                                                                                                                                                                                                                                                                                 | Histone methyltransferase |
| DRD2   | ENSG00000149295 | acepromazine<br>acetophenazine<br>adoprazine<br>afalanine<br>AJ76-(+)<br>alizapride<br>amantadine<br>amisulpride<br>amoxapine<br>aniracetam<br>aripiprazole<br>asenapine<br>azaperone<br>benperidol<br>blonanserin<br>BP-897<br>brexpiprazole<br>bromocriptine<br>bromopride<br>bromperidol<br>buspirone<br>butaclamol<br>cabergoline<br>cariprazine<br>carmoxirole<br>chlorpromazine | Dopamine receptor family  |

---

chlorprothixene  
clebopride  
clorotepine  
clozapine  
deoxyepinephrine  
desipramine  
dihydrexidine  
dihydroergocristine  
dihydroergotamine  
domperidone  
dopamine  
doxepin  
droperidol  
ergotamine  
eticlopride  
flupentixol  
fluphenazine  
fluphenazine-decanoate  
fluspirilene  
haloperidol  
haloperidol-decanoate  
iloperidone  
imipramine  
itopride  
JNJ-37822681  
L-693403  
L-745870  
levodopa  
levomepromazine  
levosulpiride  
lisuride  
loxapine  
lumateperone  
lurasidone  
maprotiline  
melperone  
memantine  
mesoridazine  
metoclopramide  
mianserin  
minaprine  
mirtazapine  
molindone  
nafadotride  
nemonapride  
nomifensine  
nortriptyline  
olanzapine  
paliperidone  
pardoprunox  
PD-128907

---

---

PD-168077  
pergolide  
perospirone  
perphenazine  
pimavanserin  
pimozide  
pipamperone  
pipotiazine-palmitate  
piribedil  
pramipexole  
preclamol  
prochlorperazine  
promazine  
promethazine  
quetiapine  
quinagolide  
quinelorane  
quinpirol(-)  
r(-)-apomorphine  
raclopride  
remoxipride  
risperidone  
ropinirole  
rotigotine  
rotundine  
SCH-202676  
sertindole  
SNAP-94847  
spiperone  
sumanirole  
talipexole  
terguride  
tetrabenazine  
thiethylperazine  
thiopropazine  
thioridazine  
thiothixene  
tiapride  
trifluoperazine  
triflupromazine  
trimethobenzamide  
trimipramine  
UH-232-(+)  
vilazodone  
yohimbine  
ziprasidone  
zotepine  
zuclopenthixol  
2-CMDO  
3'-fluorobenzylspiperone  
7-hydroxy-DPAT

---

|                    |                 | 8-hydroxy-PIPAT   |                                |  |
|--------------------|-----------------|-------------------|--------------------------------|--|
| EGFR               | ENSG00000146648 | AEE788            | EGFR-RAS-ERK signaling pathway |  |
|                    |                 | afatinib          |                                |  |
|                    |                 | AG-490            |                                |  |
|                    |                 | alvocidib         |                                |  |
|                    |                 | AP26113           |                                |  |
|                    |                 | AST-1306          |                                |  |
|                    |                 | AV-412            |                                |  |
|                    |                 | AZD3759           |                                |  |
|                    |                 | AZD8931           |                                |  |
|                    |                 | AZ5104            |                                |  |
|                    |                 | BIBU-1361         |                                |  |
|                    |                 | BIBX-1382         |                                |  |
|                    |                 | BMS-599626        |                                |  |
|                    |                 | BMS-690514        |                                |  |
|                    |                 | brigatinib        |                                |  |
|                    |                 | canertinib        |                                |  |
|                    |                 | CGP-52411         |                                |  |
|                    |                 | CGP-53353         |                                |  |
|                    |                 | chrysophanic-acid |                                |  |
|                    |                 | CNX-2006          |                                |  |
|                    |                 | CUDC-101          |                                |  |
|                    |                 | dacomitinib       |                                |  |
|                    |                 | dovitinib         |                                |  |
|                    |                 | EGF816            |                                |  |
|                    |                 | erbstatin-analog  |                                |  |
|                    |                 | erlotinib         |                                |  |
|                    |                 | gefitinib         |                                |  |
|                    |                 | GW-583340         |                                |  |
|                    |                 | HKI-357           |                                |  |
|                    |                 | icotinib          |                                |  |
|                    |                 | lapatinib         |                                |  |
|                    |                 | lidocaine         |                                |  |
|                    |                 | mubritinib        |                                |  |
|                    |                 | neratinib         |                                |  |
|                    |                 | olmutinib         |                                |  |
|                    |                 | orantinib         |                                |  |
|                    |                 | OSI-420           |                                |  |
|                    |                 | osimertinib       |                                |  |
|                    |                 | PD-153035         |                                |  |
|                    |                 | PD-158780         |                                |  |
| PD-168393          |                 |                   |                                |  |
| pelitinib          |                 |                   |                                |  |
| PKI-166            |                 |                   |                                |  |
| poziotinib         |                 |                   |                                |  |
| PP-121             |                 |                   |                                |  |
| rociletinib        |                 |                   |                                |  |
| tyrphostin-AG-1478 |                 |                   |                                |  |
| tyrphostin-AG-18   |                 |                   |                                |  |
| tyrphostin-AG-494  |                 |                   |                                |  |
| tyrphostin-AG-835  |                 |                   |                                |  |
| tyrphostin-AG-99   |                 |                   |                                |  |
| vandetanib         |                 |                   |                                |  |

|       |                 |                                                                                                                                                                                                                                                                                                                                                                                                |                                                  |
|-------|-----------------|------------------------------------------------------------------------------------------------------------------------------------------------------------------------------------------------------------------------------------------------------------------------------------------------------------------------------------------------------------------------------------------------|--------------------------------------------------|
|       |                 | vatalanib<br>WHI-P154<br>WZ-3146<br>WZ-4002<br>WZ8040<br>XL-647<br>ZM-306416                                                                                                                                                                                                                                                                                                                   |                                                  |
| EHMT2 | ENSG00000204371 | A-366<br>BIX-01294<br>BRD4770<br>UNC0224<br>UNC0321<br>UNC0631<br>UNC0638<br>UNC0642<br>UNC0646<br>UNC0737                                                                                                                                                                                                                                                                                     | Histone Lysine Methyltransferase                 |
| EIF4E | ENSG00000151247 | 4EGI-1<br>4E1RCat                                                                                                                                                                                                                                                                                                                                                                              | RAS-ERK pathway                                  |
| EPHA2 | ENSG00000142627 | dasatinib<br>regorafenib<br>vandetanib                                                                                                                                                                                                                                                                                                                                                         | Tyrosine-Protein Kinase Receptor family          |
| ERBB2 | ENSG00000141736 | AEE788<br>afatinib<br>ARRY-334543<br>AST-1306<br>AV-412<br>AZD8931<br>BIBX-1382<br>BMS-536924<br>BMS-599626<br>BMS-690514<br>canertinib<br>CP-724714<br>CUDC-101<br>dacomitinib<br>FERb-033<br>GW-583340<br>lapatinib<br>mubritinib<br>neratinib<br>PD-168393<br>poziotinib<br>TAK-285<br>tucatinib<br>tyrphostin-AG-825<br>tyrphostin-AG-879<br>vandetanib<br>WAY-200070<br>WZ-4002<br>XL-647 | EGF receptor family of receptor tyrosine kinases |
| ESR1  | ENSG00000091831 | afimoxifene                                                                                                                                                                                                                                                                                                                                                                                    | Oestrogen receptor signaling                     |

---

allylestrenol  
AZD9496  
bazedoxifene  
benfluralin  
bisphenol-a  
bithionol  
chlorotrianisene  
clomifene  
danazol  
dehydroepiandrosterone  
dehydroepiandrosterone-sulfate  
desogestrel  
dienestrol  
diethylstilbestrol  
droloxifene  
endoxifen  
equol  
erteberel  
estetrol  
estradiol  
estradiol-acetate  
estradiol-benzoate  
estradiol-cypionate  
estradiol-valerate  
estramustine  
estramustine-phosphate  
estriol  
estrone  
estropipate  
ethinyl-estradiol  
ethynodiol-diacetate  
etonogestrel  
flouxymesterone  
fosfestrol  
fulvestrant  
GDC-0810  
genistein  
gestrinone  
hexestrol  
lasofoxifene  
levonorgestrel  
medroxyprogesterone  
melatonin  
mestranol  
mitotane  
naloxone  
norgestimate  
ospemifene  
PPT  
progesterone  
promestriene

---

|      |                 |                                                                                                                                                                                                                                                                                                                                                                                                                                                                                                                                                                                                   |                                    |
|------|-----------------|---------------------------------------------------------------------------------------------------------------------------------------------------------------------------------------------------------------------------------------------------------------------------------------------------------------------------------------------------------------------------------------------------------------------------------------------------------------------------------------------------------------------------------------------------------------------------------------------------|------------------------------------|
|      |                 | quineestrol<br>raloxifene<br>SNG-1153<br>tamoxifen<br>tibolone<br>toremifene<br>trilostane<br>Y-134<br>ZK-164015<br>17-hydroxyprogesterone-<br>caproate                                                                                                                                                                                                                                                                                                                                                                                                                                           |                                    |
|      |                 | afimoxifene<br>bazedoxifene<br>bisphenol-a<br>bithionol<br>chlorotrianisene<br>C11-Acetate<br>dehydroepiandrosterone<br>dehydroepiandrosterone-sulfate<br>diarylpropionitrile<br>diethylstilbestrol<br>equol<br>erteberel<br>estradiol<br>estramustine<br>estramustine-phosphate<br>estriol<br>estrone<br>estropipate<br>ethinyl-estradiol<br>fosfestrol<br>fulvestrant<br>genistein<br>hexestrol<br>lasofoxifene<br>morin<br>naringenin<br>ospemifene<br>PHTPP<br>prinaberel<br>raloxifene<br>tamoxifen<br>trilostane<br>WAY-200070<br>Y-134<br>ZK-164015<br>17-hydroxyprogesterone-<br>caproate |                                    |
| ESR2 | ENSG00000140009 |                                                                                                                                                                                                                                                                                                                                                                                                                                                                                                                                                                                                   | Oestrogen receptor signaling       |
|      |                 | CPI-169<br>CPI-360<br>E11<br>EPZ005687                                                                                                                                                                                                                                                                                                                                                                                                                                                                                                                                                            |                                    |
| EZH2 | ENSG00000106462 |                                                                                                                                                                                                                                                                                                                                                                                                                                                                                                                                                                                                   | Histone-lysine N-methyltransferase |

|       |                 |                                                                                                                                                                                                                                                                                          |                       |
|-------|-----------------|------------------------------------------------------------------------------------------------------------------------------------------------------------------------------------------------------------------------------------------------------------------------------------------|-----------------------|
|       |                 | EPZ011989<br>GSK2816126<br>GSK503<br>tazemetostat<br>UNC1999<br>3-deazaneplanocin-A                                                                                                                                                                                                      |                       |
| FGFR1 | ENSG00000077782 | AZD4547<br>brivanib<br>CH-5183284<br>danusertib<br>dovitinib<br>erdafitinib<br>HMN-214<br>lucitanib<br>LY2874455<br>MK-2461<br>nintedanib<br>NVP-BGJ398<br>orantinib<br>pazopanib<br>PD-161570<br>PD-173074<br>ponatinib<br>regorafenib<br>RG1530<br>semaxanib<br>sorafenib<br>TG-100801 | FGF signaling pathway |
| FGFR2 | ENSG00000066468 | AEE788<br>AZD4547<br>CH-5183284<br>dovitinib<br>erdafitinib<br>LY2874455<br>MK-2461<br>nintedanib<br>NVP-BGJ398<br>orantinib<br>PD-173074<br>ponatinib<br>regorafenib<br>RG1530<br>thalidomide                                                                                           | FGF signaling pathway |
| FGFR3 | ENSG00000068078 | AEE788<br>AZD4547<br>brivanib-alaninate<br>CH-5183284<br>dovitinib<br>erdafitinib<br>LY2874455<br>masitinib<br>MK-2461                                                                                                                                                                   | FGF signaling pathway |



|       |                 |                                                                                                                                                                                                                                                                                                     |                       |
|-------|-----------------|-----------------------------------------------------------------------------------------------------------------------------------------------------------------------------------------------------------------------------------------------------------------------------------------------------|-----------------------|
|       |                 | nintedanib<br>NVP-BGJ398<br>pazopanib<br>PD-173074<br>ponatinib                                                                                                                                                                                                                                     |                       |
| FGFR4 | ENSG00000160867 | AZD4547<br>BLU9931<br>erdafitinib<br>LY2874455<br>nintedanib<br>NVP-BGJ398<br>PD-173074<br>ponatinib                                                                                                                                                                                                | FGF signaling pathway |
| FGR   | ENSG00000000938 | dasatinib<br>GDC-0980<br>PRT062607<br>rebastinib                                                                                                                                                                                                                                                    | FGF signaling pathway |
| FLT1  | ENSG00000102755 | axitinib<br>brivanib<br>cediranib<br>dovitinib<br>foretinib<br>HMN-214<br>KRN-633<br>linifanib<br>lucitanib<br>MK-2461<br>motesanib<br>nintedanib<br>pazopanib<br>PD-173074<br>regorafenib<br>semaxanib<br>sorafenib<br>TG-100801<br>tivozanib<br>toceranib<br>vandetanib<br>vatalanib<br>ZM-306416 | VEGF signling         |
| FLT3  | ENSG00000122025 | AMG-925<br>BMS-690514<br>cediranib<br>ceritinib<br>crenolanib<br>dovitinib<br>ENMD-2076<br>gilteritinib<br>GTP-14564<br>HMN-214<br>KW-2449                                                                                                                                                          | VEGF signaling        |

|       |                 |                                                                                                                                                                                                                                                                               |                                    |
|-------|-----------------|-------------------------------------------------------------------------------------------------------------------------------------------------------------------------------------------------------------------------------------------------------------------------------|------------------------------------|
|       |                 | lestaurtinib<br>linifanib<br>midostaurin<br>MK-2461<br>NMS-1286937<br>pacritinib<br>pexidartinib<br>ponatinib<br>quizartinib<br>rebastinib<br>RGB-286638<br>SGI-1776<br>sorafenib<br>tandutinib<br>TCS-359<br>TG-02<br>toceranib<br>tyrphostin-AG-1296<br>UNC2025<br>URMC-099 |                                    |
| FLT4  | ENSG00000037280 | axitinib<br>cediranib<br>dovitinib<br>foretinib<br>HMN-214<br>KRN-633<br>lenvatinib<br>linifanib<br>MK-2461<br>motesanib<br>nintedanib<br>pazopanib<br>PD-173074<br>regorafenib<br>SAR131675<br>sorafenib<br>tivozanib<br>vandetanib<br>vatalanib<br>XL-647<br>ZM-306416      | VEGF signaling                     |
| FRK   | ENSG00000111816 | bosutinib<br>dasatinib<br>regorafenib                                                                                                                                                                                                                                         | Tyrosin kinase signaling           |
| FYN   | ENSG00000010810 | bosutinib<br>dasatinib                                                                                                                                                                                                                                                        | Src Family Tyrosine Kinase         |
| GLS   | ENSG00000115419 | CB-839<br>L-glutamic-acid                                                                                                                                                                                                                                                     | Phosphate-activated amidohydrolase |
| GSK3A | ENSG00000105723 | AZD1080<br>CHIR-98014<br>CHIR-99021<br>GSK-3-inhibitor-IX                                                                                                                                                                                                                     | Wnt signaling pathway              |

|       |                 |                        |                       |
|-------|-----------------|------------------------|-----------------------|
|       |                 | indirubin              |                       |
|       |                 | SB-216763              |                       |
|       |                 | SB-415286              |                       |
|       |                 | AR-A014418             |                       |
|       |                 | AT7867                 |                       |
|       |                 | AZD1080                |                       |
|       |                 | AZD2858                |                       |
|       |                 | bisindolylmaleimide-ix |                       |
|       |                 | BX-795                 |                       |
|       |                 | BX-912                 |                       |
|       |                 | CDK1-5-inhibitor       |                       |
|       |                 | CHIR-98014             |                       |
|       |                 | CHIR-99021             |                       |
|       |                 | ellagic-acid           |                       |
|       |                 | enzastaurin            |                       |
|       |                 | GSK-3-inhibitor-IX     |                       |
|       |                 | indirubin-3-monoxime   |                       |
| GSK3B | ENSG00000082701 | kenpaullone            | Wnt signaling pathway |
|       |                 | LY2090314              |                       |
|       |                 | LY294002               |                       |
|       |                 | PD-98059               |                       |
|       |                 | PF-573228              |                       |
|       |                 | RGB-286638             |                       |
|       |                 | SB-202190              |                       |
|       |                 | SB-203580              |                       |
|       |                 | SB-216763              |                       |
|       |                 | SB-415286              |                       |
|       |                 | TCS2002                |                       |
|       |                 | tideglusib             |                       |
|       |                 | TWS-119                |                       |
|       |                 | U-0126                 |                       |
|       |                 | 1-azakenpaullone       |                       |
|       |                 | 8-hydroxy-DPAT         |                       |
|       |                 | ACY-1215               |                       |
|       |                 | AR-42                  |                       |
|       |                 | belinostat             |                       |
|       |                 | dacinostat             |                       |
|       |                 | entinostat             |                       |
|       |                 | givinostat             |                       |
|       |                 | JNJ-26481585           |                       |
|       |                 | mocetinostat           |                       |
|       |                 | nexturastat-a          |                       |
| HDAC1 | ENSG00000116478 | NSC-3852               | Histone deacetylase   |
|       |                 | panobinostat           |                       |
|       |                 | parthenolide(-)        |                       |
|       |                 | PCI-24781              |                       |
|       |                 | PCI-34051              |                       |
|       |                 | phenylbutyrate         |                       |
|       |                 | pivanex                |                       |
|       |                 | pyroxamide             |                       |
|       |                 | resminostat            |                       |
|       |                 | RG2833                 |                       |

|       |                 |                                                                                                                                                                                                                                                                                                               |                     |
|-------|-----------------|---------------------------------------------------------------------------------------------------------------------------------------------------------------------------------------------------------------------------------------------------------------------------------------------------------------|---------------------|
|       |                 | romidepsin<br>SB-939<br>scriptaid<br>sodium-butyrate<br>tacedinaline<br>trichostatin-a<br>valproic-acid<br>vorinostat<br>4SC-202                                                                                                                                                                              |                     |
| HDAC2 | ENSG00000196591 | ACY-1215<br>aminophylline<br>belinostat<br>CUDC-907<br>dacinostat<br>entinostat<br>givinostat<br>JNJ-26481585<br>lovastatin<br>MC1568<br>mocetinostat<br>oxtriphylline<br>panobinostat<br>PCI-24781<br>pivanex<br>romidepsin<br>scriptaid<br>sodium-butyrate<br>trichostatin-a<br>valproic-acid<br>vorinostat | Histone deacetylase |
| HDAC3 | ENSG00000171720 | ACY-1215<br>belinostat<br>chidamide<br>dacinostat<br>entinostat<br>givinostat<br>JNJ-26481585<br>mocetinostat<br>panobinostat<br>PCI-24781<br>pivanex<br>resminostat<br>RGFP966<br>RG2833<br>romidepsin<br>SB-939<br>scriptaid<br>sodium-butyrate<br>trichostatin-a<br>vorinostat                             | Histone deacetylase |
| HDAC6 | ENSG00000094631 | ACY-1215<br>belinostat                                                                                                                                                                                                                                                                                        | Histone deacetylase |

|          |                 |                                                                                                                                                                                                                                                |                                    |
|----------|-----------------|------------------------------------------------------------------------------------------------------------------------------------------------------------------------------------------------------------------------------------------------|------------------------------------|
|          |                 | bufexamac<br>dacinostat<br>droxinostat<br>givinostat<br>JNJ-26481585<br>nexturastat-a<br>panobinostat<br>PCI-24781<br>PCI-34051<br>resminostat<br>romidepsin<br>scriptaid<br>trichostatin-a<br>tubastatin-a<br>vorinostat                      |                                    |
| HDAC8    | ENSG00000147099 | ACY-1215<br>belinostat<br>dacinostat<br>droxinostat<br>givinostat<br>JNJ-26481585<br>panobinostat<br>PCI-34051<br>pivanex<br>resminostat<br>romidepsin<br>scriptaid<br>sodium-butyrate<br>trichostatin-a<br>vorinostat                         | Histone deacetylase                |
| HSP90AA1 | ENSG00000080824 | alvespimycin<br>AT13387<br>BIIB021<br>CCT018159<br>ganetespib<br>gedunin<br>geldanamycin<br>hexylene-glycol<br>nedocromil<br>NVP-AUY922<br>NVP-HSP990<br>PU-H71<br>retaspimycin<br>rhein<br>rifabutin<br>SNX-5422<br>tanespimycin<br>VER-49009 | Heat Shock Protein 90 Alpha Family |
| IDH1     | ENSG00000138413 | AGI-5198<br>enasidenib<br>ivosidenib                                                                                                                                                                                                           | Isocitrate dehydrogenase family    |
| IDH2     | ENSG00000182054 | AGI-6780                                                                                                                                                                                                                                       | Isocitrate dehydrogenase family    |

|       |                 |                 |                                 |
|-------|-----------------|-----------------|---------------------------------|
| IGF1R | ENSG00000140443 | AG-1024         | Receptor tyrosine kinase family |
|       |                 | AZD3463         |                                 |
|       |                 | AZD4547         |                                 |
|       |                 | BMS-536924      |                                 |
|       |                 | BMS-754807      |                                 |
|       |                 | ceritinib       |                                 |
|       |                 | GSK1838705A     |                                 |
|       |                 | GSK1904529A     |                                 |
|       |                 | linsitinib      |                                 |
|       |                 | NT157           |                                 |
|       |                 | NVP-ADW742      |                                 |
|       |                 | NVP-AEW541      |                                 |
|       |                 | podophyllotoxin |                                 |
|       |                 | PQ-401          |                                 |
|       |                 | XL228           |                                 |
| IL1B  | ENSG00000125538 | bergenin        | Interleukin-cytokine family     |
|       |                 | diacerein       |                                 |
|       |                 | glucosamine     |                                 |
|       |                 | hypoestoxide    |                                 |
|       |                 | ibudilast       |                                 |
|       |                 | JTE-607         |                                 |
| IL6   | ENSG00000136244 | minocycline     | Interleukin-cytokine family     |
|       |                 | tanshinone-ii-a |                                 |
|       |                 | ibudilast       |                                 |
| INSR  | ENSG00000171105 | JTE-607         | Receptor tyrosine kinase family |
|       |                 | trofinetide     |                                 |
|       |                 | ceritinib       |                                 |
|       |                 | dovitinib       |                                 |
|       |                 | GSK1838705A     |                                 |
|       |                 | GSK1904529A     |                                 |
| ITK   | ENSG00000113263 | linsitinib      | Interleukin-cytokine family     |
|       |                 | NVP-AEW541      |                                 |
| JAK1  | ENSG00000162434 | NVP-TAE684      | Jak-STAT signaling pathway      |
|       |                 | pazopanib       |                                 |
|       |                 | AZD1480         |                                 |
|       |                 | baricitinib     |                                 |
|       |                 | curcumol        |                                 |
|       |                 | cyt387          |                                 |
|       |                 | filgotinib      |                                 |
|       |                 | itacitinib      |                                 |
|       |                 | NS-018          |                                 |
|       |                 | pacritinib      |                                 |
|       |                 | peficitinib     |                                 |
|       |                 | ruxolitinib     |                                 |
|       |                 | ruxolitinib-(S) |                                 |
|       |                 | solcitinib      |                                 |
| JAK2  | ENSG00000096968 | TG-101348       | Jak-STAT signaling pathway      |
|       |                 | tofacitinib     |                                 |
|       |                 | WHI-P154        |                                 |
|       |                 | XL019           |                                 |
|       |                 | ZM-39923        |                                 |
|       |                 | AG-490          |                                 |

|       |                 |                                                                                                                                                                                                                                                                                                                                  |                            |
|-------|-----------------|----------------------------------------------------------------------------------------------------------------------------------------------------------------------------------------------------------------------------------------------------------------------------------------------------------------------------------|----------------------------|
|       |                 | AT-9283<br>atiprimod<br>AZD1480<br>AZ960<br>baricitinib<br>CEP-33779<br>CKD-712<br>curcumol<br>cyt387<br>filgotinib<br>LY2784544<br>NS-018<br>NVP-BSK805<br>pacritinib<br>peficitinib<br>RGB-286638<br>ruxolitinib<br>ruxolitinib-(S)<br>TG-02<br>TG-101209<br>TG-101348<br>thiram<br>tofacitinib<br>WHI-P154<br>WP1130<br>XL019 |                            |
| JAK3  | ENSG00000105639 | AG-490<br>AT-9283<br>AZD1480<br>curcumol<br>cyt387<br>decernotinib<br>filgotinib<br>JAK3-inhibitor-V<br>LY2784544<br>NS-018<br>pacritinib<br>peficitinib<br>ruxolitinib<br>TG-101209<br>TG-101348<br>tofacitinib<br>WHI-P154<br>XL019<br>ZM-39923                                                                                | Jak-STAT signaling pathway |
| KDM1A | ENSG00000004487 | GSK2879552<br>OG-L002<br>ORY-1001<br>tranylcypromine                                                                                                                                                                                                                                                                             | Histone demethylase        |
| KDR   | ENSG00000128052 | ACTB-1003<br>AEE788                                                                                                                                                                                                                                                                                                              | VEGF family                |

altiratinib  
anlotinib  
apatinib  
axitinib  
AZD4547  
BMS-536924  
BMS-690514  
BMS-817378  
brivanib  
BX-795  
BX-912  
cabozantinib  
cediranib  
CYC116  
dovitinib  
ENMD-2076  
foretinib  
fruquintinib  
golvatinib  
HMN-214  
KI-8751  
KRN-633  
lenvatinib  
linifanib  
lucitanib  
LY2874455  
MK-2461  
motesanib  
neratinib  
nintedanib  
NVP-BGJ398  
orantinib  
OSI-930  
pazopanib  
PD-153035  
PD-173074  
PLX-4720  
ponatinib  
PP-121  
regorafenib  
semaxanib  
SKLB1002  
sorafenib  
SU-4312  
SU014813  
telatinib  
TG-100572  
TG-100801  
tie2-kinase-inhibitor  
tivozanib  
toceranib  
tyrphostin-AG-879  
vandetanib



|      |                 |                                                                                                                                                                                                                                                                                                                                                   |                            |
|------|-----------------|---------------------------------------------------------------------------------------------------------------------------------------------------------------------------------------------------------------------------------------------------------------------------------------------------------------------------------------------------|----------------------------|
|      |                 | vatalanib<br>XL-647<br>ZM-306416<br>ZM-323881                                                                                                                                                                                                                                                                                                     |                            |
| KIT  | ENSG00000157404 | amuvatinib<br>apatinib<br>cediranib<br>CP-673451<br>crenolanib<br>dasatinib<br>DCC-2618<br>dovitinib<br>GTP-14564<br>HMN-214<br>imatinib<br>linifanib<br>lucitanib<br>masitinib<br>motesanib<br>nilotinib<br>OSI-930<br>pazopanib<br>pexidartinib<br>ponatinib<br>quizartinib<br>regorafenib<br>semaxanib<br>sorafenib<br>tandutinib<br>tivozanib | RAS-ERK signaling pathway  |
| LAP3 | ENSG00000002549 | tosedostat                                                                                                                                                                                                                                                                                                                                        | Leucine Aminopeptidase     |
| LCK  | ENSG00000182866 | bisindolylmaleimide-ix<br>BMS-536924<br>CGP-57380<br>dasatinib<br>GW-788388<br>KN-62<br>LY294002<br>PD-98059<br>ponatinib<br>PP-2<br>saracatinib<br>SB-202190<br>SB-203580<br>SRC-kinase-inhibitor-I<br>tozasertib<br>U-0126<br>ZM-336372<br>8-hydroxy-DPAT                                                                                       | Src Family Tyrosine Kinase |
| LDHA | ENSG00000134333 | coenzyme-i<br>nicotinamide                                                                                                                                                                                                                                                                                                                        | Lactate Dehydrogenase      |

|        |                 |                                                                                                                                                                                                                                                     |                                |
|--------|-----------------|-----------------------------------------------------------------------------------------------------------------------------------------------------------------------------------------------------------------------------------------------------|--------------------------------|
| LYN    | ENSG00000254087 | bafetinib<br>bosutinib<br>dasatinib<br>ponatinib<br>PP-2<br>rebastinib<br>tolimidone                                                                                                                                                                | Src Family Tyrosine Kinase     |
| MAP2   | ENSG00000078018 | docetaxel<br>estramustine<br>estramustine-phosphate<br>paclitaxel                                                                                                                                                                                   | Microtubule Associated Protein |
| MAP2K1 | ENSG00000169032 | arctigenin<br>AS-703026<br>BI-847325<br>bosutinib<br>MEK162<br>nobiletin<br>PD-0325901<br>PD-184352<br>PD-198306<br>PD-318088<br>PD-98059<br>refametinib<br>reversine<br>Ro-4987655<br>Ro-5126766<br>selumetinib<br>TAK-733<br>trametinib<br>U-0126 | RAS-ERK signaling pathway      |
| MAP2K2 | ENSG00000126934 | AS-703026<br>BI-847325<br>bosutinib<br>MEK1-2-inhibitor<br>MEK162<br>PD-198306<br>refametinib<br>Ro-5126766<br>trametinib<br>U-0126                                                                                                                 | RAS-ERK signaling pathway      |
| MAP3K8 | ENSG00000107968 | cot-inhibitor-1<br>cot-inhibitor-2                                                                                                                                                                                                                  | RAS-ERK signaling pathway      |
| MAP4   | ENSG00000047849 | docetaxel<br>paclitaxel                                                                                                                                                                                                                             | Microtubule Associated Protein |
| MAPK1  | ENSG00000100030 | arsenic-trioxide<br>bisindolylmaleimide-ix<br>BMS-536924<br>CHIR-99021<br>FR-180204<br>GDC-0994<br>isoprenaline                                                                                                                                     | RAS-ERK signaling pathway      |

|        |                 |                                                                                                                                                                                                             |                           |
|--------|-----------------|-------------------------------------------------------------------------------------------------------------------------------------------------------------------------------------------------------------|---------------------------|
|        |                 | KN-62<br>LY294002<br>olomoucine<br>PD-98059<br>purvalanol-b<br>ravoxertinib<br>SB-202190<br>SB-203580<br>TIC10<br>U-0126<br>VX-11e                                                                          |                           |
| MAPK11 | ENSG00000185386 | AMG-548<br>bisindolylmaleimide-ix<br>doramapimod<br>EO-1428<br>KN-62<br>LY294002<br>PD-98059<br>PH-797804<br>regorafenib<br>SB-202190<br>SB-203580<br>SB-239063<br>talmapimod<br>U-0126<br>VX-702<br>VX-745 | RAS-ERK signaling pathway |
| MAPK12 | ENSG00000188130 | AMG-548<br>bisindolylmaleimide-ix<br>doramapimod<br>KN-62<br>LY294002<br>PD-98059<br>SB-202190<br>SB-203580<br>U-0126<br>VX-702<br>VX-745                                                                   | RAS-ERK signaling pathway |
| MAPK13 | ENSG00000156711 | AMG-548<br>doramapimod                                                                                                                                                                                      | RAS-ERK signaling pathway |
| MAPK14 | ENSG00000112062 | AMG-548<br>bisindolylmaleimide-ix<br>CMPD-1<br>doramapimod<br>EO-1428<br>GW-788388<br>JX-401<br>KN-62<br>losmapimod<br>LY2228820<br>LY294002                                                                | RAS-ERK signaling pathway |

|       |                 |                                                                                                                                                                                                                                                                                                                            |                           |
|-------|-----------------|----------------------------------------------------------------------------------------------------------------------------------------------------------------------------------------------------------------------------------------------------------------------------------------------------------------------------|---------------------------|
|       |                 | PD-98059<br>pexmetinib<br>PH-797804<br>QX-314<br>RWJ-67657<br>SB-202190<br>SB-203580<br>SB-239063<br>SB-242235<br>SD-169<br>semapimod<br>skeptinone-1<br>SKF-86002<br>SX-011<br>TA-01<br>TAK-715<br>talmapimod<br>tie2-kinase-inhibitor<br>tyrphostin-AG-1478<br>U-0126<br>VX-702<br>VX-745<br>ZM-336372<br>8-hydroxy-DPAT |                           |
| MAPK3 | ENSG00000102882 | arsenic-trioxide<br>CID-5458317<br>FR-180204<br>GDC-0994<br>purvalanol-b<br>ravoxertinib<br>sulindac                                                                                                                                                                                                                       | RAS-ERK signaling pathway |
| MAPK7 | ENSG00000166484 | BIX-02189<br>ERK5-IN-1<br>XMD17-109<br>XMD8-92                                                                                                                                                                                                                                                                             | RAS-ERK signaling pathway |
| MAPK8 | ENSG00000107643 | antagonist-g<br>BI-78D3<br>bisindolylmaleimide-ix<br>CC-401<br>KN-62<br>LY294002<br>PD-98059<br>PGL5001<br>pyrazolanthrone<br>SB-202190<br>SB-203580<br>SR-3306<br>SU3327<br>U-0126                                                                                                                                        | RAS-ERK signaling pathway |
| MAPK9 | ENSG00000050748 | PGL5001<br>pyrazolanthrone                                                                                                                                                                                                                                                                                                 | RAS-ERK signaling pathway |

|       |                 |                                                                                                                                                                                                                                                                                                                                                                  |                                |
|-------|-----------------|------------------------------------------------------------------------------------------------------------------------------------------------------------------------------------------------------------------------------------------------------------------------------------------------------------------------------------------------------------------|--------------------------------|
|       |                 | RGB-286638<br>SB-203580<br>SR-3306                                                                                                                                                                                                                                                                                                                               |                                |
| MAPT  | ENSG00000186868 | docetaxel<br>leucomethylene-blue<br>paclitaxel                                                                                                                                                                                                                                                                                                                   | Microtubule Associated Protein |
| MCL1  | ENSG00000143384 | bithionol<br>morin<br>rosmarinic-acid<br>TW-37                                                                                                                                                                                                                                                                                                                   | BCL2 Family Member             |
| MDM2  | ENSG00000135679 | AMG-232<br>CGM097<br>idasanutlin<br>JNJ-26481585<br>nutlin-3<br>RG7112<br>RITA<br>SAR405838<br>serdemetan                                                                                                                                                                                                                                                        | TP53-MDM2 pathway              |
| MET   | ENSG00000105976 | alectinib<br>altiratinib<br>AMG-208<br>AMG-337<br>AMG458<br>amuvatinib<br>BMS-536924<br>BMS-777607<br>BMS-817378<br>cabozantinib<br>crizotinib<br>EMD-1214063<br>foretinib<br>golvatinib<br>INC-280<br>JNJ-38877605<br>LY2801653<br>MGCD-265<br>MK-2461<br>MK-8033<br>NVP-BVU972<br>PF-04217903<br>PHA-665752<br>savolitinib<br>SGX523<br>SU-11274<br>tivantinib | RAS-ERK signaling pathway      |
| MKNK1 | ENSG00000079277 | CGP-57380                                                                                                                                                                                                                                                                                                                                                        |                                |
| MTOR  | ENSG00000198793 | AZD2014<br>AZD8055<br>AZ20<br>beta-hydroxy-beta-                                                                                                                                                                                                                                                                                                                 | HGF-MET-PI3K signaling pathway |

|       |                 |                                                                                                                                                                                                                                                                                                                                                                                                                                                                                        |                                        |
|-------|-----------------|----------------------------------------------------------------------------------------------------------------------------------------------------------------------------------------------------------------------------------------------------------------------------------------------------------------------------------------------------------------------------------------------------------------------------------------------------------------------------------------|----------------------------------------|
|       |                 | methylbutyrate<br>BGT226<br>CC-115<br>CC-223<br>chrysophanic-acid<br>CH5132799<br>compound-401<br>deforolimus<br>everolimus<br>GDC-0980<br>GSK2126458<br>ku-0063794<br>LY294002<br>LY3023414<br>MLN0128<br>NVP-BEZ235<br>OSI-027<br>palomid-529<br>PF-04691502<br>PF-05212384<br>PI-103<br>pimecrolimus<br>PKI-179<br>PP-121<br>PP242<br>SAR-245409<br>SB-2343<br>sirolimus<br>temsirolimus<br>torin-1<br>torin-2<br>VE-822<br>voxtalisib<br>WAY-600<br>WYE-125132<br>WYE-354<br>XL388 |                                        |
| MYC   | ENSG00000136997 | TWS-119                                                                                                                                                                                                                                                                                                                                                                                                                                                                                | MYC family                             |
| NAMPT | ENSG00000105835 | FK-866<br>GMX1778<br>STF-118804                                                                                                                                                                                                                                                                                                                                                                                                                                                        | Nicotinamide Phosphoribosyltransferase |
| NFKB1 | ENSG00000109320 | andrographolide<br>arglabin<br>aspirin<br>pranlukast<br>thalidomide<br>triflusal                                                                                                                                                                                                                                                                                                                                                                                                       | NFKB pathway                           |
| NR2C2 | ENSG00000177463 | retinol<br>tretinoin                                                                                                                                                                                                                                                                                                                                                                                                                                                                   | Hormone receptor family                |
| NTRK1 | ENSG00000198400 | amitriptyline<br>danusertib                                                                                                                                                                                                                                                                                                                                                                                                                                                            | Tyrosine kinase receptor family        |

|        |                 |                                                                                                                                                                                                 |                                      |
|--------|-----------------|-------------------------------------------------------------------------------------------------------------------------------------------------------------------------------------------------|--------------------------------------|
|        |                 | entrectinib<br>GW-441756<br>GW-5074<br>imatinib<br>lestaurtinib<br>LOXO-101<br>MK-2461<br>PHA-848125<br>regorafenib<br>tyrphostin-AG-879                                                        |                                      |
| NUDT1  | ENSG00000106268 | crizotinib-(S)<br>TH588                                                                                                                                                                         | Hydrolase family                     |
| P4HB   | ENSG00000185624 | ribostamycin-sulfate                                                                                                                                                                            | Hydroxylase famliy                   |
| PAK1   | ENSG00000149269 | FRAX486<br>IPA-3<br>RKI-1447                                                                                                                                                                    | PAK family - P21 activated kinase    |
| PAK4   | ENSG00000130669 | FRAX486<br>GSK690693<br>PF-03758309                                                                                                                                                             | PAK family - P21 activated kinase    |
| PARP1  | ENSG00000143799 | AG-14361<br>BYK-204165<br>DR-2313<br>E7449<br>iniparib<br>inosine<br>nicotinamide<br>niraparib<br>NU-1025<br>olaparib<br>PJ-34<br>rucaparib<br>S-111<br>veliparib<br>3-amino-benzamide<br>4-HQN | TP53-MDM2 pathway                    |
| PARP2  | ENSG00000129484 | AC-55541<br>E7449<br>olaparib<br>rucaparib<br>talazoparib<br>UPF-1069<br>veliparib                                                                                                              | TP53-MDM2 pathway                    |
| PARP3  | ENSG00000041880 | DR-2313<br>ME0328<br>PJ-34                                                                                                                                                                      | TP53-MDM2 pathway                    |
| PDGFRA | ENSG00000134853 | BMS-536924<br>cediranib<br>CP-673451<br>crenolanib<br>DCC-2618<br>dovitinib<br>ENMD-2076                                                                                                        | PDGF-PDGFR-RAS-ERK signaling pathway |

|        |                 |                                                                                                                                                                                                                                                                                                                                                                                        |                                      |
|--------|-----------------|----------------------------------------------------------------------------------------------------------------------------------------------------------------------------------------------------------------------------------------------------------------------------------------------------------------------------------------------------------------------------------------|--------------------------------------|
|        |                 | HMN-214<br>imatinib<br>lucitanib<br>masitinib<br>nintedanib<br>orantinib<br>pazopanib<br>PD-173074<br>ponatinib<br>PP-121<br>quizartinib<br>regorafenib<br>semaxanib<br>TAK-593<br>tivozanib<br>toceranib<br>trapidil                                                                                                                                                                  |                                      |
|        |                 | anlotinib<br>BMS-536924<br>cediranib<br>CP-673451<br>crenolanib<br>dasatinib<br>dovitinib<br>flumatinib<br>GTP-14564<br>HMN-214<br>imatinib<br>linifanib<br>lucitanib<br>masitinib<br>MK-2461<br>nintedanib<br>ON123300<br>orantinib<br>pazopanib<br>PD-173074<br>quizartinib<br>regorafenib<br>semaxanib<br>sorafenib<br>SU-4312<br>tandutinib<br>tivozanib<br>toceranib<br>vatalanib |                                      |
| PDGFRB | ENSG00000113721 |                                                                                                                                                                                                                                                                                                                                                                                        | PDGF-PDGFR-RAS-ERK signaling pathway |
|        |                 | AZD7545<br>BX-795<br>BX-912<br>dichloroacetate                                                                                                                                                                                                                                                                                                                                         | PI3K signaling pathway               |
| PDK1   | ENSG00000152256 |                                                                                                                                                                                                                                                                                                                                                                                        |                                      |
| PGD    | ENSG00000142657 | dacarbazine                                                                                                                                                                                                                                                                                                                                                                            | Phosphogluconate Dehydrogenase       |



|        |                 |               |                                |
|--------|-----------------|---------------|--------------------------------|
|        |                 | ketotifen     |                                |
|        |                 | pentetic-acid |                                |
|        |                 | alpelisib     |                                |
|        |                 | AS-604850     |                                |
|        |                 | AZD6482       |                                |
|        |                 | AZD8835       |                                |
|        |                 | A66           |                                |
|        |                 | BGT226        |                                |
|        |                 | buparlisib    |                                |
|        |                 | caffeine      |                                |
|        |                 | CH5132799     |                                |
|        |                 | copanlisib    |                                |
|        |                 | GDC-0349      |                                |
|        |                 | GDC-0941      |                                |
|        |                 | GDC-0980      |                                |
|        |                 | GSK2126458    |                                |
|        |                 | idelalisib    |                                |
| PIK3CA | ENSG00000121879 | IPI-145       | HGF-MET-PI3K signaling pathway |
|        |                 | LY294002      |                                |
|        |                 | MLN0128       |                                |
|        |                 | MLN1117       |                                |
|        |                 | NVP-BEZ235    |                                |
|        |                 | PF-04691502   |                                |
|        |                 | PF-05212384   |                                |
|        |                 | PI-103        |                                |
|        |                 | PIK-293       |                                |
|        |                 | PIK-75        |                                |
|        |                 | PP-121        |                                |
|        |                 | SB-2343       |                                |
|        |                 | taselisib     |                                |
|        |                 | TG100-115     |                                |
|        |                 | voxtalisib    |                                |
|        |                 | wortmannin    |                                |
|        |                 | XL-147        |                                |
|        |                 | acalisib      |                                |
|        |                 | alpelisib     |                                |
|        |                 | AZD6482       |                                |
|        |                 | AZD8186       |                                |
|        |                 | BGT226        |                                |
|        |                 | caffeine      |                                |
|        |                 | CH5132799     |                                |
|        |                 | copanlisib    |                                |
| PIK3CB | ENSG00000051382 | GDC-0941      | HGF-MET-PI3K signaling pathway |
|        |                 | GDC-0980      |                                |
|        |                 | GSK2126458    |                                |
|        |                 | GSK2636771    |                                |
|        |                 | idelalisib    |                                |
|        |                 | IPI-145       |                                |
|        |                 | LY294002      |                                |
|        |                 | PI-103        |                                |
|        |                 | PIK-293       |                                |
|        |                 | PIK-294       |                                |

|        |                 |                                                                                                                                                                                                                                                                                                                                                   |                                |
|--------|-----------------|---------------------------------------------------------------------------------------------------------------------------------------------------------------------------------------------------------------------------------------------------------------------------------------------------------------------------------------------------|--------------------------------|
|        |                 | PIK-75<br>PP-121<br>SB-2343<br>TGX-221<br>TG100-115<br>ZSTK-474                                                                                                                                                                                                                                                                                   |                                |
|        |                 | acalisib<br>alpelisib<br>AMG-319<br>AMG319<br>AZD6482<br>AZD8186<br>AZD8835<br>caffeine<br>CH5132799<br>copanlisib<br>GDC-0941<br>GDC-0980<br>GSK2126458<br>idelalisib<br>IPI-145<br>LY294002<br>MLN0128<br>NVP-BEZ235<br>PI-103<br>PIK-293<br>PIK-294<br>PIK-75<br>PP-121<br>SB-2343<br>TGX-221<br>TG100-115<br>wortmannin<br>XL-147<br>ZSTK-474 |                                |
| PIK3CD | ENSG00000171608 |                                                                                                                                                                                                                                                                                                                                                   | HGF-MET-PI3K signaling pathway |
|        |                 | alpelisib<br>AS-252424<br>AS-604850<br>AZD6482<br>BGT226<br>buparlisib<br>CAY10505<br>CH5132799<br>copanlisib<br>CZC24832<br>GDC-0941<br>GDC-0980<br>GSK1059615<br>GSK2126458<br>idelalisib<br>IPI-145<br>LY294002                                                                                                                                |                                |
| PIK3CG | ENSG00000105851 |                                                                                                                                                                                                                                                                                                                                                   | HGF-MET-PI3K signaling pathway |

|        |                 |                                                                                                                                                                                                   |                                |
|--------|-----------------|---------------------------------------------------------------------------------------------------------------------------------------------------------------------------------------------------|--------------------------------|
|        |                 | MLN0128<br>myricetin<br>NVP-BEZ235<br>PI-103<br>PIK-293<br>PIK-294<br>PIK-75<br>PIK-93<br>PP-121<br>quercetin<br>SAR-245409<br>SB-2343<br>TG100-115<br>VE-822<br>wortmannin<br>XL-147<br>ZSTK-474 |                                |
| PIM1   | ENSG00000137193 | adenosine-phosphate<br>ammonium-perfluorocaprylate<br>AZD1208<br>BMS-863233<br>dexfosfoserine<br>GF109203X<br>PIM-1-Inhibitor-2<br>quercetin<br>SGI-1776<br>SMI-4a<br>10-DEBC                     | Serine/Threonine Kinase family |
| PIM2   | ENSG00000102096 | AZD1208<br>SGI-1776                                                                                                                                                                               | Serine/Threonine Kinase family |
| PIM3   | ENSG00000198355 | AZD1208<br>SGI-1776                                                                                                                                                                               | Serine/Threonine Kinase family |
| PLK1   | ENSG00000166851 | BI-2536<br>GSK461364<br>GW-843682X<br>LY294002<br>NMS-1286937<br>rigosertib<br>TAK-960<br>volasertib<br>wortmannin                                                                                | Serine/threonine kinase family |
| PORCN  | ENSG00000102312 | ETC-159<br>IWP-L6<br>LGK-974<br>wnt-c59                                                                                                                                                           | WNT signaling pathway          |
| PPM1D  | ENSG00000170836 | GSK2830371                                                                                                                                                                                        | Serine/threonine kinase family |
| PRKAA1 | ENSG00000132356 | adenosine-phosphate<br>adenosine-triphosphate<br>aspirin<br>phenformin                                                                                                                            | Serine/threonine kinase family |
| PRKCA  | ENSG00000154229 | bisindolylmaleimide-ix                                                                                                                                                                            | Serine/threonine kinase family |

|       |                 |                                                                                                                                                                                                                                   |                                |
|-------|-----------------|-----------------------------------------------------------------------------------------------------------------------------------------------------------------------------------------------------------------------------------|--------------------------------|
|       |                 | C-1<br>ellagic-acid<br>enzastaurin<br>go-6983<br>ingenol-mebutate<br>KN-62<br>LY294002<br>myricitrin<br>PD-98059<br>SB-202190<br>SB-203580<br>SC-10<br>SC-9<br>sotrastaurin<br>tamoxifen<br>U-0126<br>vitamin-E<br>8-hydroxy-DPAT |                                |
| PRKCB | ENSG00000166501 | CGP-53353<br>ellagic-acid<br>enzastaurin<br>go-6983<br>ingenol-mebutate<br>sotrastaurin<br>tamoxifen<br>vitamin-E<br>8-hydroxy-DPAT                                                                                               | Serine/threonine kinase family |
| PRKCD | ENSG00000163932 | afimoxifene<br>enzastaurin<br>go-6983<br>ingenol-mebutate<br>sotrastaurin<br>tamoxifen<br>8-hydroxy-DPAT                                                                                                                          | Serine/threonine kinase family |
| PRKCE | ENSG00000171132 | afimoxifene<br>BMY-45618<br>ingenol-mebutate<br>sotrastaurin<br>tamoxifen<br>Y-27632<br>8-hydroxy-DPAT                                                                                                                            | Serine/threonine kinase family |
| PRKCG | ENSG00000126583 | enzastaurin<br>go-6983<br>ingenol-mebutate<br>midostaurin<br>tamoxifen<br>8-hydroxy-DPAT                                                                                                                                          | Serine/threonine kinase family |
| PRKCH | ENSG00000027075 | sotrastaurin                                                                                                                                                                                                                      | Serine/threonine kinase family |
| PRKCI | ENSG00000163558 | aurothioglucose<br>GF109203X<br>tamoxifen                                                                                                                                                                                         | Serine/threonine kinase family |

|       |                 |                                                                                                                                                                                                                                                                                                                                                                                                                     |                                            |
|-------|-----------------|---------------------------------------------------------------------------------------------------------------------------------------------------------------------------------------------------------------------------------------------------------------------------------------------------------------------------------------------------------------------------------------------------------------------|--------------------------------------------|
| PRKCQ | ENSG00000065675 | afimoxifene<br>dexfosfoserine<br>GSK690693<br>sotrastaurin<br>tamoxifen                                                                                                                                                                                                                                                                                                                                             | Serine/threonine kinase family             |
| PRKCZ | ENSG00000067606 | afimoxifene<br>arachidonic-acid<br>GF109203X<br>go-6983<br>tamoxifen                                                                                                                                                                                                                                                                                                                                                | Serine/threonine kinase family             |
| PRKDC | ENSG00000253729 | caffeine<br>compound-401<br>KU-55933<br>LY294002<br>NU-7026<br>NU-7441<br>PI-103<br>PIK-75<br>PP-121<br>wortmannin                                                                                                                                                                                                                                                                                                  | Serine/threonine kinase family             |
| PSMB1 | ENSG0000008018  | bortezomib<br>carfilzomib<br>MG-132                                                                                                                                                                                                                                                                                                                                                                                 | Multicatalytic proteinase complex          |
| PSMD1 | ENSG00000173692 | bortezomib                                                                                                                                                                                                                                                                                                                                                                                                          | Multicatalytic proteinase complex          |
| PTGS2 | ENSG00000073756 | aceclofenac<br>acemetacin<br>alpha-linolenic-acid<br>amfenac<br>aminosalicylate<br>amproxicam<br>amtolmetin-guacil<br>arundic-acid<br>asaraldehyde<br>aspirin<br>azapropazone<br>balsalazide<br>bendazac<br>bromfenac<br>carprofen<br>celecoxib<br>cicloprofen<br>curcumin<br>deracoxib<br>diclofenac<br>diflunisal<br>dihomo-gamma-linolenic-acid<br>doconexent<br>DUP-697<br>epirizole<br>etodolac<br>etofenamate | Prostaglandin-endoperoxide synthase family |

---

etoricoxib  
felbinac-ethyl  
fenbufen  
fenoprofen  
fentiazac  
firocoxib  
FK-3311  
floctafenine  
flufenamic-acid  
flurbiprofen-(+/-)  
flurbiprofen-(S)-(+)  
fosfosal  
gamma-linolenic-acid  
ginsenoside-c-k  
honokiol  
ibuprofen  
ibuprofen-(s)  
ibuprofen-lysine  
ibuprofen-piconol  
icosapent  
iguratimod  
indobufen  
indomethacin  
indoprofen  
isoxicam  
ketoprofen  
ketorolac  
lenalidomide  
licofelone  
lornoxicam  
loxoprofen  
lumiracoxib  
meclofenamic-acid  
mefenamic-acid  
meloxicam  
mesalazine  
metoxibutropate  
nabumetone  
naproxen  
nepafenac  
niflumic-acid  
nimesulide  
NO-ASA  
oxaprozin  
oxyphenbutazone  
paracetamol  
phenazone  
phenylbutazone  
piroxicam  
pomalidomide  
proglumetacin

---

|        |                 |                                                                                                                                                                                                                                                                                                                                     |                                           |
|--------|-----------------|-------------------------------------------------------------------------------------------------------------------------------------------------------------------------------------------------------------------------------------------------------------------------------------------------------------------------------------|-------------------------------------------|
|        |                 | propacetamol<br>proquazone<br>pterostilbene<br>resveratrol<br>rofecoxib<br>rutaecarpine<br>RWJ-67657<br>salicylic-acid<br>sasapyrine<br>SB-239063<br>sodium-salicylate<br>sulfasalazine<br>sulindac<br>suprofen<br>tenoxicam<br>thalidomide<br>thioctic-acid<br>tiaprofenic-acid<br>tolmetin<br>tropesin<br>ufenamate<br>valdecoxib |                                           |
| PTK2   | ENSG00000169398 | defactinib<br>ENMD-2076<br>NVP-TAE226<br>PF-562271                                                                                                                                                                                                                                                                                  | Serine/threonine kinase family            |
| PTPN11 | ENSG00000179295 | BVT-948                                                                                                                                                                                                                                                                                                                             | Protein tyrosine phosphatase (PTP) family |
| PTPN6  | ENSG00000111679 | sodium-stibogluconate                                                                                                                                                                                                                                                                                                               | Protein tyrosine phosphatase (PTP) family |
| RAC1   | ENSG00000136238 | dextromethorphan<br>EHop-016                                                                                                                                                                                                                                                                                                        | RAS superfamily                           |
| RAF1   | ENSG00000132155 | AZ-628<br>CEP-32496<br>dabrafenib<br>GW-5074<br>LY3009120<br>PD-98059<br>regorafenib<br>Ro-5126766<br>SB-203580<br>sorafenib<br>U-0126<br>vemurafenib<br>ZM-336372                                                                                                                                                                  | EGFR-RAS-ERK signaling pathway            |
| RARA   | ENSG00000131759 | AC-55649<br>acitretin<br>adapalene<br>AGN-195183<br>AM-580<br>CH55<br>EC-23<br>etretinate                                                                                                                                                                                                                                           | Retinoic acid signaling pathway           |

|       |                 |                                                                                                                                                                                    |                                 |
|-------|-----------------|------------------------------------------------------------------------------------------------------------------------------------------------------------------------------------|---------------------------------|
|       |                 | fenretinide<br>isotretinoin<br>tamibarotene<br>tazarotene<br>tretinoin<br>TTNPB                                                                                                    |                                 |
| RARB  | ENSG00000077092 | AC-55649<br>acitretin<br>adapalene<br>adarotene<br>CH55<br>EC-23<br>etretinate<br>isotretinoin<br>LE-135<br>tamibarotene<br>tazarotene<br>tretinoin<br>TTNPB                       | Retinoic acid signaling pathway |
| RARG  | ENSG00000172819 | acitretin<br>adapalene<br>adarotene<br>CD-1530<br>CD-437<br>EC-23<br>etretinate<br>isotretinoin<br>palovarotene<br>tazarotene<br>tretinoin<br>TTNPB                                | Retinoic acid signaling pathway |
| RET   | ENSG00000165731 | apatinib<br>danusertib<br>fostamatinib<br>HMN-214<br>imatinib<br>linifanib<br>lucitanib<br>ponatinib<br>PP-1<br>quizartinib<br>regorafenib<br>semaxanib<br>sorafenib<br>vandetanib | RAS-ERK signaling pathway       |
| ROCK1 | ENSG00000067900 | AT13148<br>bisindolylmaleimide-ix<br>fasudil<br>GSK429286A<br>hydroxyfasudil<br>KN-62<br>LX7101                                                                                    | RhoGEF pathway                  |



|         |                 |                                                                                                                                                                                     |                                 |
|---------|-----------------|-------------------------------------------------------------------------------------------------------------------------------------------------------------------------------------|---------------------------------|
|         |                 | LY294002<br>PD-98059<br>ripasudil<br>RKI-1447<br>SAR407899<br>SB-202190<br>SB-203580<br>U-0126<br>Y-27632<br>Y-39983                                                                |                                 |
| ROCK2   | ENSG00000134318 | AT13148<br>fasudil<br>KD025<br>LX7101<br>ripasudil<br>RKI-1447<br>Y-27632<br>Y-39983                                                                                                | RhoGEF pathway                  |
| RPS6KB1 | ENSG00000108443 | bisindolylmaleimide-ix<br>KN-62<br>LY2584702<br>LY294002<br>PD-98059<br>PF-4708671<br>PHA-767491<br>SB-202190<br>SB-203580<br>SB-415286<br>U-0126                                   | PI3K-AKT-MTOR pathway           |
| RRM1    | ENSG00000167325 | caracemide<br>cladribine<br>clofarabine<br>didox<br>enocitabine<br>fludarabine<br>fludarabine-phosphate<br>gemcitabine<br>gemcitabine-elaidate<br>hydroxyurea<br>imexon<br>triapine | RAS-ERK signaling pathway       |
| RXRA    | ENSG00000186350 | acitretin<br>adapalene<br>AGN-194310<br>bexarotene<br>BMS-649<br>etodolac<br>etretinate<br>GW-9662<br>peretinoin<br>retinol                                                         | Retinoic acid signaling pathway |

|       |                 |                                                                                                                                                                                                                                                      |                                 |
|-------|-----------------|------------------------------------------------------------------------------------------------------------------------------------------------------------------------------------------------------------------------------------------------------|---------------------------------|
| RXRB  | ENSG00000204231 | acitretin<br>adapalene<br>AGN-194310<br>bexarotene<br>etretinate<br>retinol<br>T-0901317<br>tazarotene<br>tretinoin                                                                                                                                  | Retinoic acid signaling pathway |
| SGK3  | ENSG00000104205 | AT13148                                                                                                                                                                                                                                              | PI3K-AKT-MTOR pathway           |
| SMO   | ENSG00000128602 | BMS-833923<br>CUR-61414<br>fluocinonide<br>glasdegib<br>PF-5274857<br>purmorphamine<br>SANT-1<br>SANT-2<br>sonidegib<br>taladegib<br>vismodegib                                                                                                      | Hedgehog signaling pathway      |
| SRC   | ENSG00000197122 | bosutinib<br>citric-acid<br>dasatinib<br>ENMD-2076<br>KX2-391<br>PD-168393<br>ponatinib<br>PP-121<br>PP-2<br>purvalanol-a<br>rebastinib<br>saracatinib<br>SB-203580<br>TG-100572<br>TG-100801<br>tolimidone<br>vandetanib<br>XL228<br>1-naphthyl-PP1 | SRC pathway                     |
| STAT3 | ENSG00000168610 | acitretin<br>atiprimod<br>bardoxolone-methyl<br>cryptotanshinone<br>meisoindigo<br>napabucasin<br>niclosamide<br>ochromycinone<br>STAT3-inhibitor-VI<br>WP1066                                                                                       | Jak-STAT signaling pathway      |
| SYK   | ENSG00000165025 | BAY-61-3606<br>ellagic-acid                                                                                                                                                                                                                          | TLR signaling                   |

|          |                 |                                                                                                                                                                                                                                                                                                                                 |                       |
|----------|-----------------|---------------------------------------------------------------------------------------------------------------------------------------------------------------------------------------------------------------------------------------------------------------------------------------------------------------------------------|-----------------------|
|          |                 | ER-27319<br>fostamatinib<br>GDC-0980<br>GS-9973<br>PRT062070<br>PRT062607<br>R112                                                                                                                                                                                                                                               |                       |
| TEK      | ENSG00000120156 | ACTB-1003<br>altiratinib<br>linifanib<br>pexmetinib<br>ponatinib<br>regorafenib<br>vandetanib                                                                                                                                                                                                                                   | Tie2 family           |
| TNF      | ENSG00000232810 | amrinone<br>baicalein<br>bergenin<br>chloroquine<br>clenbuterol<br>CPI-1189<br>epinephrine<br>ethyl-pyruvate<br>glucosamine<br>glycitein<br>hypoestoxide<br>JTE-607<br>lenalidomide<br>ligustilide<br>pentoxifylline<br>pirfenidone<br>pomalidomide<br>pranlukast<br>SB-203580<br>tanshinone-ii-a<br>thalidomide<br>trofinetide | TNF signaling pathway |
| TNFSF11  | ENSG00000120659 | lenalidomide                                                                                                                                                                                                                                                                                                                    | TNF signaling pathway |
| TNFSF13B | ENSG00000102524 | citric-acid                                                                                                                                                                                                                                                                                                                     | TNF signaling pathway |
| TOP1     | ENSG00000198900 | aclarubicin<br>beta-lapachone<br>camptothecin<br>exatecan-mesylate<br>genz-644282<br>irinotecan<br>luteolin<br>nemorubicin<br>pyrazoloacridine<br>rubitecan<br>SN-38<br>sodium-stibogluconate<br>TAS-103                                                                                                                        | Topoisomerase family  |

|       |                 |                                                                                                                                                                                                                                                                                                                                                                                                                                                                                                                                |                            |
|-------|-----------------|--------------------------------------------------------------------------------------------------------------------------------------------------------------------------------------------------------------------------------------------------------------------------------------------------------------------------------------------------------------------------------------------------------------------------------------------------------------------------------------------------------------------------------|----------------------------|
|       |                 | topotecan<br>10-hydroxycamptothecin<br>9-aminocamptothecin                                                                                                                                                                                                                                                                                                                                                                                                                                                                     |                            |
|       |                 | aclarubicin<br>aldoxorubicin<br>amonafide<br>amrubicin<br>amsacrine<br>ciprofloxacin<br>daunorubicin<br>dexrazoxane<br>doxorubicin<br>enoxacin<br>epirubicin<br>etoposide<br>etoposide-phosphate<br>garenoxacin<br>genistein<br>idarubicin<br>levofloxacin<br>lomefloxacin<br>merbarone<br>mitoxantrone<br>moxifloxacin<br>nemorubicin<br>norfloxacin<br>ofloxacin<br>pefloxacin<br>pirarubicin<br>pixantrone<br>podophyllotoxin<br>pyrazoloacridine<br>sparfloxacin<br>teniposide<br>trovafloxacin<br>valrubicin<br>voreloxin |                            |
| TOP2A | ENSG00000131747 |                                                                                                                                                                                                                                                                                                                                                                                                                                                                                                                                | Topoisomerase family       |
|       |                 | amonafide<br>amrubicin<br>daunorubicin<br>dexrazoxane<br>etoposide<br>teniposide                                                                                                                                                                                                                                                                                                                                                                                                                                               |                            |
| TOP2B | ENSG00000077097 |                                                                                                                                                                                                                                                                                                                                                                                                                                                                                                                                | Topoisomerase family       |
|       |                 | allicin<br>alpha-linolenic-acid<br>AM-404<br>AMG-517<br>AMG-9810<br>anandamide<br>aspartame<br>camphor-(+)                                                                                                                                                                                                                                                                                                                                                                                                                     |                            |
| TRPV1 | ENSG00000196689 |                                                                                                                                                                                                                                                                                                                                                                                                                                                                                                                                | TRP family of ion channels |

|      |                 |                                                                                                                                                                                                                                                                                                                                                                                                   |                                |
|------|-----------------|---------------------------------------------------------------------------------------------------------------------------------------------------------------------------------------------------------------------------------------------------------------------------------------------------------------------------------------------------------------------------------------------------|--------------------------------|
|      |                 | capsaicin<br>capsazepine<br>evodiamine<br>icosapent<br>JNJ-17203212<br>MK-2295<br>nonivamide<br>olvanil<br>paracetamol<br>piperine<br>SB-366791<br>SB-705498<br>2-APB<br>6-iodo-nordihydrocapsaicin                                                                                                                                                                                               |                                |
| TUBB | ENSG00000196230 | ABT-751<br>albendazole<br>cabazitaxel<br>carbendazim<br>cevipabulin<br>colchicine<br>CYT-997<br>D-64131<br>docetaxel<br>dolastatin-10<br>epothilone-b<br>epothilone-d<br>fenbendazole<br>flubendazole<br>ixabepilone<br>mebendazole<br>oxibendazole<br>paclitaxel<br>parbendazole<br>podophyllotoxin<br>verubulin<br>vinblastine<br>vincristine<br>vindesine<br>vinorelbine<br>2-methoxyestradiol | Microtubule Associated Protein |
| TXN  | ENSG00000136810 | C11-Acetate<br>PX-12                                                                                                                                                                                                                                                                                                                                                                              | Redox signaling                |
| TYMS | ENSG00000176890 | capecitabine<br>carmofur<br>doxifluridine<br>enocitabine<br>floxuridine<br>ftorafur<br>gemcitabine<br>gemcitabine-elaidate<br>leucovorin<br>nolatrexed                                                                                                                                                                                                                                            | Thymidylate synthase           |

|       |                 |                                                                                                                |                                |
|-------|-----------------|----------------------------------------------------------------------------------------------------------------|--------------------------------|
|       |                 | pemetrexed<br>pralatrexate<br>raltitrexed<br>trifluridine<br>trimethoprim<br>WR99210<br>5-fluorouracil<br>5-FP |                                |
| TYRO3 | ENSG00000092445 | BMS-777607<br>LDC1267                                                                                          | Protein Tyrosine Kinase family |
| VEGFA | ENSG00000112715 | carvedilol<br>glucicazide<br>minocycline<br>pidolic-acid<br>trometamol<br>vandetanib                           | VEGF family                    |
| WEE1  | ENSG00000166483 | MK-1775<br>PD-407824                                                                                           | Serine/Threonine Kinase family |
| XIAP  | ENSG00000101966 | AZD5582<br>birinapant<br>cisplatin<br>CUDC-427<br>embelin<br>GDC-0152<br>LCL-161<br>SM-164                     | BCL2 signaling                 |
| XPO1  | ENSG00000082898 | elactocin<br>KPT-185<br>KPT-276<br>selinexor                                                                   | Cell cycle regulator           |

**Supplementary Table S1B. shRNAs targeting each candidate gene are reported. For each cell line sequenced, LOG<sub>2</sub> ratio of each replica calculated; call for depletion in all tree replicates; gene depletion call.**

| Cell line | shRNAs     | LOG2R(1) | LOG2R(2) | LOG2R(3) | Triplicate shRNA Hit |
|-----------|------------|----------|----------|----------|----------------------|
| CAR1      | BIRC5_1908 | -5,85    | -7,39    | -4,04    | 0                    |
|           | BIRC5_1909 | -6,21    | -6,91    | -7,64    | 1                    |
|           | BIRC5_1910 | -8,56    | -7,15    | -6,91    | 1                    |
|           | BIRC5_1911 | 1,15     | -1,89    | -0,95    | 0                    |
|           | BIRC5_1912 | -0,96    | -7,14    | -5,28    | 0                    |
|           | BIRC5_1913 | -0,68    | -2,55    | -2,59    | 0                    |
|           | BIRC5_599  | -8,87    | -7,51    | -8,20    | 1                    |
|           | BIRC5_600  | -7,96    | -7,55    | -7,42    | 1                    |
|           | BIRC5_601  | -7,39    | -7,82    | -4,23    | 0                    |
|           | BIRC5_602  | -10,89   | 1,81     | -9,36    | 0                    |
| CAR1      | EGFR_1660  | -3,43    | -2,36    | -11,33   | 0                    |
|           | EGFR_1701  | -9,64    | -7,98    | -9,40    | 1                    |
|           | EGFR_1753  | -10,06   | -8,28    | -9,61    | 1                    |
|           | EGFR_716   | 3,74     | -7,11    | -3,36    | 0                    |
|           | EGFR_717   | -10,14   | -7,83    | -7,25    | 1                    |
|           | EGFR_718   | -1,22    | -9,98    | -4,53    | 0                    |
|           | EGFR_719   | -0,22    | -8,64    | -10,63   | 0                    |
|           | EGFR_720   | -10,92   | -10,02   | -7,31    | 1                    |
|           | EGFR_721   | -3,38    | -5,43    | -5,25    | 0                    |
|           | EGFR_722   | -5,05    | -4,10    | -4,77    | 0                    |
| CAR1      | LAP3_2092  | -4,25    | -1,21    | -5,51    | 0                    |
|           | LAP3_2093  | -2,38    | -2,40    | -1,41    | 0                    |
|           | LAP3_2094  | -11,38   | -9,06    | -9,13    | 1                    |
|           | LAP3_2095  | -4,07    | -3,46    | -12,70   | 0                    |
|           | LAP3_2096  | -10,42   | -8,18    | -8,59    | 1                    |
|           | LAP3_947   | -5,02    | -3,89    | -2,28    | 0                    |
|           | LAP3_948   | -6,16    | -9,58    | -10,06   | 1                    |
|           | LAP3_949   | -3,21    | -3,77    | -1,94    | 0                    |
|           | LAP3_950   | -11,14   | -6,28    | -7,04    | 1                    |
|           | LAP3_951   | -4,64    | -11,95   | -2,35    | 0                    |
| WIDR      | BRAF_1610  | 1,08     | -1,00    | -0,63    | 0                    |
|           | BRAF_1795  | -2,17    | -1,26    | -1,27    | 1                    |
|           | BRAF_613   | -1,52    | -1,35    | -3,85    | 1                    |
|           | BRAF_614   | -0,37    | -3,56    | -0,33    | 0                    |
|           | BRAF_615   | -5,58    | -1,01    | 1,24     | 0                    |
|           | BRAF_616   | -1,93    | -1,96    | -1,75    | 1                    |
|           | BRAF_617   | -2,46    | -0,72    | -0,83    | 0                    |
|           | BRAF_618   | -6,94    | -3,61    | 0,35     | 0                    |
|           | BRAF_619   | -1,34    | -1,58    | -1,53    | 1                    |
|           | BRAF_620   | -1,84    | -7,33    | -3,94    | 1                    |
| WIDR      | GLS_2030   | 0,64     | 0,00     | 0,21     | 0                    |
|           | GLS_2031   | -0,52    | 0,13     | -0,61    | 0                    |
|           | GLS_2032   | 0,40     | 0,61     | -0,91    | 0                    |
|           | GLS_2033   | -1,08    | -1,54    | -1,12    | 1                    |
|           | GLS_2034   | -0,68    | -0,55    | -1,01    | 0                    |
|           | GLS_807    | -2,54    | -3,38    | -2,13    | 1                    |
|           | GLS_808    | 1,06     | 1,06     | 0,64     | 0                    |

|         |             |       |       |       |   |
|---------|-------------|-------|-------|-------|---|
|         | GLS_809     | -3,07 | -3,22 | -3,34 | 1 |
|         | GLS_810     | -5,07 | -1,95 | -2,15 | 1 |
|         | GLS_811     | -0,33 | -1,25 | -0,89 | 0 |
| WIDR    | HDAC8_1830  | -3,21 | -4,17 | -1,24 | 1 |
|         | HDAC8_2042  | 1,55  | 1,40  | 1,52  | 0 |
|         | HDAC8_2043  | -0,37 | -2,47 | -1,62 | 0 |
|         | HDAC8_2044  | -2,99 | -1,64 | -2,51 | 1 |
|         | HDAC8_2045  | -0,84 | -0,18 | -0,45 | 0 |
|         | HDAC8_856   | 1,11  | 0,82  | 0,28  | 0 |
|         | HDAC8_857   | -2,04 | -3,05 | -1,12 | 1 |
|         | HDAC8_858   | 1,07  | 1,58  | 0,89  | 0 |
|         | HDAC8_859   | -0,97 | -0,87 | -0,70 | 0 |
|         | HDAC8_860   | -2,92 | -1,50 | -3,42 | 1 |
| WIDR    | MAPK1_1004  | -1,02 | -0,45 | -1,17 | 0 |
|         | MAPK1_1005  | -1,09 | -1,07 | -0,85 | 1 |
|         | MAPK1_1006  | -1,53 | -2,61 | -1,32 | 1 |
|         | MAPK1_1007  | -0,80 | -0,46 | -0,40 | 0 |
|         | MAPK1_1008  | -2,47 | -1,45 | -1,84 | 1 |
|         | MAPK1_1009  | -1,88 | -2,19 | 0,18  | 0 |
|         | MAPK1_1010  | -1,54 | 0,44  | -0,01 | 0 |
|         | MAPK1_1717  | -0,21 | -0,13 | 0,02  | 0 |
|         | MAPK1_2122  | -0,03 | -4,17 | -3,95 | 0 |
|         | MAPK1_2123  | -1,70 | -1,73 | -2,51 | 1 |
| WIDR    | PRKAA1_1238 | -1,10 | -2,56 | -2,27 | 1 |
|         | PRKAA1_1239 | -1,43 | 1,40  | -1,58 | 0 |
|         | PRKAA1_1240 | -2,00 | -1,11 | -1,04 | 1 |
|         | PRKAA1_1241 | -1,37 | -1,70 | -1,46 | 1 |
|         | PRKAA1_1539 | 0,90  | 0,80  | 0,79  | 0 |
|         | PRKAA1_1540 | 0,20  | -1,47 | -1,33 | 0 |
|         | PRKAA1_1541 | -1,72 | -2,43 | -1,33 | 1 |
|         | PRKAA1_1789 | 2,69  | 2,75  | 2,51  | 0 |
|         | PRKAA1_1790 | -0,57 | -1,43 | -2,07 | 0 |
|         | PRKAA1_1791 | 1,63  | 1,12  | 1,14  | 0 |
| WIDR    | PRKCI_1267  | -1,39 | -0,53 | -1,91 | 0 |
|         | PRKCI_1268  | -0,37 | 0,23  | -0,04 | 0 |
|         | PRKCI_1269  | -2,58 | -1,78 | -2,55 | 1 |
|         | PRKCI_1270  | -1,46 | -1,81 | -1,87 | 1 |
|         | PRKCI_1271  | -1,15 | -1,69 | -0,89 | 1 |
|         | PRKCI_1272  | -1,03 | -1,50 | 0,99  | 0 |
|         | PRKCI_1604  | 3,37  | 4,24  | 4,31  | 0 |
|         | PRKCI_1605  | -0,71 | 1,25  | 0,42  | 0 |
|         | PRKCI_1787  | 1,53  | 0,83  | 1,12  | 0 |
|         | PRKCI_2255  | -3,26 | -1,26 | -2,01 | 1 |
| LIM2099 | CDK1_1944   | 2,92  | 2,57  | 0,93  | 0 |
|         | CDK1_1945   | 0,96  | 0,30  | 0,14  | 0 |
|         | CDK1_1946   | -5,39 | -1,58 | -3,55 | 1 |
|         | CDK1_1947   | -3,06 | 0,55  | -0,84 | 1 |
|         | CDK1_1948   | -7,33 | 6,56  | -1,14 | 0 |
|         | CDK1_1949   | 0,20  | 0,62  | -0,21 | 0 |
|         | CDK1_1950   | -0,02 | 2,77  | 1,88  | 0 |
|         | CDK1_641    | -2,44 | -2,94 | -1,81 | 1 |



|         |            |       |       |       |   |
|---------|------------|-------|-------|-------|---|
|         | CDK1_642   | -4,85 | -5,44 | -4,28 | 1 |
|         | CDK1_643   | 0,57  | 0,55  | 0,21  | 0 |
| LIM2099 | FYN_1575   | 0,05  | 5,10  | 3,93  | 0 |
|         | FYN_1576   | -2,57 | -1,69 | -5,52 | 1 |
|         | FYN_1833   | 0,82  | -0,60 | -0,34 | 0 |
|         | FYN_1834   | 2,43  | 2,00  | 2,29  | 0 |
|         | FYN_801    | 1,28  | 2,27  | 1,21  | 0 |
|         | FYN_802    | -2,56 | 0,64  | -3,90 | 1 |
|         | FYN_803    | -1,29 | 2,82  | 1,94  | 0 |
|         | FYN_804    | -0,79 | 5,71  | 0,82  | 0 |
|         | FYN_805    | -1,54 | -1,40 | -1,40 | 1 |
|         | FYN_806    | -5,47 | -1,46 | -1,66 | 1 |
| SW403   | CDK1_1944  | 0,01  | -0,11 | 0,53  | 0 |
|         | CDK1_1945  | 1,14  | 1,38  | 0,84  | 0 |
|         | CDK1_1946  | -3,15 | -0,13 | -2,52 | 0 |
|         | CDK1_1947  | -0,65 | 0,81  | -1,54 | 0 |
|         | CDK1_1948  | -9,31 | -8,88 | -8,54 | 1 |
|         | CDK1_1949  | -5,06 | -3,30 | 0,84  | 0 |
|         | CDK1_1950  | -1,50 | -3,18 | -8,13 | 1 |
|         | CDK1_641   | -2,91 | -2,39 | -1,08 | 1 |
|         | CDK1_642   | -1,95 | 3,30  | -8,36 | 0 |
|         | CDK1_643   | -1,21 | -3,64 | -2,06 | 1 |
| SW403   | CDK4_1508  | 3,24  | -0,19 | -2,38 | 0 |
|         | CDK4_1734  | 4,76  | -9,70 | -0,59 | 0 |
|         | CDK4_652   | -5,72 | -2,68 | -1,88 | 1 |
|         | CDK4_653   | -0,90 | -5,22 | -3,27 | 1 |
|         | CDK4_654   | 6,32  | -0,71 | -6,10 | 0 |
|         | CDK4_655   | -9,62 | -9,52 | -1,49 | 1 |
|         | CDK4_656   | -0,20 | -0,06 | 0,99  | 0 |
|         | CDK4_657   | -0,57 | -2,75 | -1,23 | 0 |
|         | CDK4_658   | 0,88  | 1,40  | -7,44 | 0 |
|         | CDK4_659   | -1,90 | -2,03 | -1,80 | 1 |
| SW403   | HDAC6_2039 | -1,24 | -2,50 | -5,23 | 1 |
|         | HDAC6_2040 | -2,08 | -1,63 | 0,49  | 0 |
|         | HDAC6_2041 | -0,81 | -6,58 | -4,91 | 1 |
|         | HDAC6_849  | -2,00 | -2,47 | -2,55 | 1 |
|         | HDAC6_850  | 3,30  | 2,74  | 0,83  | 0 |
|         | HDAC6_851  | 1,99  | 0,04  | -0,27 | 0 |
|         | HDAC6_852  | -0,39 | -0,95 | 0,53  | 0 |
|         | HDAC6_853  | -0,59 | 2,01  | 1,46  | 0 |
|         | HDAC6_854  | -2,72 | -5,76 | -1,64 | 1 |
|         | HDAC6_855  | -1,45 | 0,28  | -0,97 | 0 |
| SW403   | PARP1_1147 | 2,73  | -0,23 | -2,52 | 0 |
|         | PARP1_1148 | -0,95 | -2,11 | -4,38 | 1 |
|         | PARP1_1149 | -1,82 | -1,54 | -1,95 | 1 |
|         | PARP1_1150 | -2,18 | 1,64  | 5,08  | 0 |
|         | PARP1_1151 | 0,07  | -1,81 | -0,35 | 0 |
|         | PARP1_1152 | -2,67 | -2,63 | -1,70 | 1 |
|         | PARP1_1622 | 0,39  | 0,60  | 1,54  | 0 |
|         | PARP1_2191 | 3,91  | 0,53  | 1,53  | 0 |
|         | PARP1_2192 | -5,79 | -2,66 | -2,95 | 1 |

|       |            |        |        |       |   |
|-------|------------|--------|--------|-------|---|
|       | PARP1_2193 | 1,76   | -2,56  | -0,14 | 0 |
| SW403 | PGD_1173   | -7,43  | -0,27  | -2,38 | 0 |
|       | PGD_1174   | 0,22   | -3,31  | -1,77 | 0 |
|       | PGD_1175   | -8,08  | 0,81   | -5,96 | 0 |
|       | PGD_1176   | -5,45  | -5,28  | -1,29 | 1 |
|       | PGD_1647   | 0,47   | -4,68  | -8,65 | 0 |
|       | PGD_1648   | -2,76  | -3,28  | -2,80 | 1 |
|       | PGD_1649   | -1,91  | -1,62  | -4,91 | 1 |
|       | PGD_1819   | 0,49   | 0,49   | 1,09  | 0 |
|       | PGD_1820   | -6,62  | -3,40  | -4,60 | 1 |
|       | PGD_2208   | -0,40  | 0,26   | -2,22 | 0 |
| SW403 | PRKCH_1265 | 2,57   | -0,92  | -0,75 | 0 |
|       | PRKCH_1266 | 1,22   | 0,72   | 0,34  | 0 |
|       | PRKCH_1611 | -0,14  | 1,27   | 4,70  | 0 |
|       | PRKCH_1612 | -4,34  | -0,77  | -0,88 | 0 |
|       | PRKCH_2249 | -4,00  | -3,36  | -1,50 | 1 |
|       | PRKCH_2250 | 4,60   | 1,36   | 2,84  | 0 |
|       | PRKCH_2251 | -1,55  | -1,58  | -1,49 | 1 |
|       | PRKCH_2252 | -3,27  | -2,44  | -2,48 | 1 |
|       | PRKCH_2253 | -2,14  | -0,94  | -1,03 | 1 |
|       | PRKCH_2254 | 8,42   | -9,58  | -9,63 | 0 |
| SW403 | TUBB_1459  | 2,75   | -2,68  | -7,62 | 0 |
|       | TUBB_1460  | -10,65 | -0,60  | -2,37 | 0 |
|       | TUBB_1461  | -9,44  | -11,47 | -2,11 | 1 |
|       | TUBB_2394  | -5,05  | -3,57  | -8,12 | 1 |
|       | TUBB_2395  | -3,02  | -5,05  | -7,67 | 1 |
|       | TUBB_2396  | -2,35  | -2,50  | -2,26 | 1 |
|       | TUBB_2397  | 0,46   | -0,52  | -0,38 | 0 |
|       | TUBB_2398  | -4,44  | -2,47  | 1,70  | 0 |
|       | TUBB_2399  | -2,65  | -1,68  | -0,69 | 0 |
|       | TUBB_2400  | -0,92  | -7,40  | -1,45 | 1 |

**Supplementary Table S1C. Expression levels expressed as TMM of each candidate hit in the CRC cell lines used for the synthetic lethal screening.**

| <b>Gene</b> | <b>CAR1</b> | <b>LIM2099</b> | <b>SW403</b> | <b>WIDR</b> |
|-------------|-------------|----------------|--------------|-------------|
| TUBB        | 4076.296    | 10098.391      | 4903.074     | 2268.020    |
| EGFR        | 711.560     | 387.6250       | 31.195       | 280.3801    |
| PGD         | 2564.576    | 1263.310       | 2009.560     | 1563.810    |
| LAP3        | 752.781     | 1085.649       | 612.888      | 2131.641    |
| CDK1        | 302.359     | 478.156        | 1635.901     | 603.011     |
| CDK4        | 994.588     | 1089.631       | 1342.928     | 895.392     |
| PARP1       | 968.608     | 1244.899       | 926.659      | 340.057     |
| BIRC5       | 432.197     | 1177.517       | 945.513      | 245.406     |
| GLS         | 324.003     | 955.374        | 267.322      | 174.226     |
| PRKAA1      | 272.887     | 187.631        | 214.635      | 772.220     |
| PRKCI       | 231.198     | 147.509        | 170.540      | 569.553     |
| MAPK1       | 192.555     | 286.090        | 139.834      | 190.285     |
| FYN         | 58.214      | 334.174        | 59.743       | 317.741     |
| HDAC6       | 225.543     | 185.989        | 159.662      | 296.634     |
| BRAF        | 74.448      | 25.649         | 19.513       | 187.492     |
| PRKCH       | 100.0732    | 12.522         | 36.291       | 122.889     |
| HDAC8       | 51.831      | 61.586         | 76.324       | 60.069      |

**Table S2.** Gene Ontology (GO) analysis on candidate hits from the pevonedistat synthetic lethality screening in four CRC cell lines. 17 candidate hits were used to perform a Gene Ontology (GO) analysis. GO biological processes, number of genes, P-values associated to the functional enrichment and gene belonging to each category are reported.

| GO Biological Process Term                                       | N. of hits | Hit Gene Count | Genes                                               | Percent of hits that are members of the gene set | Fold Enrichment | p-Value    |
|------------------------------------------------------------------|------------|----------------|-----------------------------------------------------|--------------------------------------------------|-----------------|------------|
| GO:0006468~protein phosphorylation                               | 17         | 8              | MAPK1, BRAF, FYN, PRKCI, PRKCH, PRKAA1, BIRC5, CDK4 | 47.059                                           | 17.329          | 0.00000010 |
| GO:0043066~negative regulation of apoptotic process              | 17         | 6              | EGFR, CDK1, BRAF, PRKCI, PRKAA1, BIRC5              | 35.294                                           | 13.025          | 0.00004874 |
| GO:0008284~positive regulation of cell proliferation             | 17         | 5              | EGFR, MAPK1, PRKAA1, BIRC5, CDK4                    | 29.412                                           | 10.598          | 0.00081719 |
| GO:0007165~signal transduction                                   | 17         | 5              | EGFR, MAPK1, PRKCH, PRKAA1, CDK4                    | 29.412                                           | 4.254           | 0.02115887 |
| GO:0009636~response to toxic substance                           | 17         | 4              | MAPK1, CDK1, CDK4, HDAC6                            | 23.529                                           | 46.483          | 0.00006684 |
| GO:0018105~peptidyl-serine phosphorylation                       | 17         | 4              | MAPK1, CDK1, PRKCI, PRKCH                           | 23.529                                           | 31.608          | 0.00021009 |
| GO:0043524~negative regulation of neuron apoptotic process       | 17         | 4              | BRAF, FYN, PRKCI, BIRC5                             | 23.529                                           | 29.932          | 0.00024671 |
| GO:0000165~MAPK cascade                                          | 17         | 4              | EGFR, MAPK1, BRAF, FYN                              | 23.529                                           | 15.080          | 0.00180911 |
| GO:0051301~cell division                                         | 17         | 4              | CDK1, TUBB, BIRC5, CDK4                             | 23.529                                           | 11.289          | 0.00410933 |
| GO:0035556~intracellular signal transduction                     | 17         | 4              | FYN, PRKCI, PRKCH, PRKAA1                           | 23.529                                           | 9.804           | 0.00608930 |
| GO:0070301~cellular response to hydrogen peroxide                | 17         | 3              | CDK1, PRKAA1, HDAC6                                 | 17.647                                           | 51.988          | 0.00131763 |
| GO:0031647~regulation of protein stability                       | 17         | 3              | MAPK1, HDAC8, HDAC6                                 | 17.647                                           | 42.333          | 0.00197944 |
| GO:0014066~regulation of phosphatidylinositol 3-kinase signaling | 17         | 3              | EGFR, MAPK1, FYN                                    | 17.647                                           | 37.991          | 0.00245049 |
| GO:0000187~activation of MAPK activity                           | 17         | 3              | MAPK1, CDK1, PRKAA1                                 | 17.647                                           | 27.694          | 0.00455375 |
| GO:0030168~platelet activation                                   | 17         | 3              | MAPK1, FYN, PRKCH                                   | 17.647                                           | 25.768          | 0.00524030 |
| GO:0000086~G2/M transition of mitotic cell cycle                 | 17         | 3              | CDK1, TUBB, BIRC5                                   | 17.647                                           | 21.630          | 0.00735728 |
| GO:0016477~cell migration                                        | 17         | 3              | CDK1, FYN, PRKCI                                    | 17.647                                           | 17.228          | 0.01139106 |
| GO:0010628~positive regulation of gene expression                | 17         | 3              | CDK1, BRAF, PRKAA1                                  | 17.647                                           | 11.310          | 0.02519840 |
| GO:0042493~response to drug                                      | 17         | 3              | CDK1, FYN, CDK4                                     | 17.647                                           | 9.748           | 0.03316525 |
